# Supplementary material for: Altered Immune Landscape and Disrupted Coral-Symbiodinium Symbiosis in the Scleractinian Coral Pocillopora damicornis by Vibrio coralliilyticus Challenge
Source: Front Physiol. 2019 Apr 2;10:366. doi: 10.3389/fphys.2019.00366 (PMC6454040; doi:10.3389/fphys.2019.00366)
Supplement: Supplementary file 1 [file Table_1.XLSX]

## Sheet: gene_count_matrix
Table S1. The mapped reads number of coral genes in the six samples.
	Control_1	Control_2	Control_3	Vibrio_1	Vibrio_2	Vibrio_3
TRINITY_DN54144_c0_g2	4	0	0	0	12	10
TRINITY_DN39452_c2_g4	12	18	4	132	2	22
TRINITY_DN46678_c3_g1	2748	2477	3260	3189	1795	3377
TRINITY_DN12628_c0_g1	0	0	0	0	4	0
TRINITY_DN54375_c2_g1	809	528	602	460	230	704
TRINITY_DN40722_c2_g2	192	234	347	30	185	227
TRINITY_DN82013_c0_g1	0	2	2	6	0	0
TRINITY_DN92544_c0_g1	55	4	12	10	62	0
TRINITY_DN576_c0_g1	0	2	0	0	0	4
TRINITY_DN40872_c2_g2	2775	1550	1767	1264	1247	1924
TRINITY_DN40872_c2_g6	38	16	3	22	16	20
TRINITY_DN40872_c2_g4	146	84	36	64	32	95
TRINITY_DN44744_c3_g1	1392	446	450	331	633	419
TRINITY_DN52491_c5_g6	0	0	0	2	0	0
TRINITY_DN82293_c0_g1	0	56	124	5	0	0
TRINITY_DN41395_c3_g1	0	2	0	12	2	0
TRINITY_DN44696_c0_g1	0	2	0	0	0	6
TRINITY_DN48836_c1_g4	205	54	80	90	153	28
TRINITY_DN50655_c1_g1	543	312	263	138	110	289
TRINITY_DN52064_c6_g1	619	353	208	151	438	240
TRINITY_DN44262_c0_g1	262	341	198	144	202	293
TRINITY_DN40848_c3_g2	1967	2180	1662	1058	413	1913
TRINITY_DN33440_c0_g2	40	28	22	12	4	16
TRINITY_DN39338_c2_g3	1942	1095	1102	628	1228	1141
TRINITY_DN33440_c0_g4	122	74	120	104	22	80
TRINITY_DN41959_c1_g1	5347	5090	6337	4900	2573	6011
TRINITY_DN54875_c0_g2	271	416	94	28	64	145
TRINITY_DN54875_c0_g3	473	920	603	126	174	522
TRINITY_DN54875_c0_g1	90	154	62	14	36	74
TRINITY_DN53895_c2_g1	1211	969	1032	837	348	971
TRINITY_DN40836_c1_g2	416	279	224	306	141	222
TRINITY_DN40836_c1_g1	1217	918	763	747	599	714
TRINITY_DN39584_c1_g2	26	12	18	20	13	18
TRINITY_DN48385_c1_g2	637	636	718	500	233	655
TRINITY_DN48638_c4_g1	2	12	8	0	0	8
TRINITY_DN103_c0_g1	0	0	0	0	0	0
TRINITY_DN43693_c1_g3	815	263	114	499	338	173
TRINITY_DN43693_c1_g2	818	124	96	669	719	139
TRINITY_DN41305_c2_g6	34	78	20	64	76	24
TRINITY_DN49411_c0_g1	3791	2737	3552	2850	1225	2307
TRINITY_DN53447_c4_g1	675	362	269	254	292	197
TRINITY_DN46114_c6_g3	144	65	80	62	67	110
TRINITY_DN6089_c0_g1	10	8	8	0	0	21
TRINITY_DN42539_c1_g1	3094	3669	2204	1040	1080	2760
TRINITY_DN52435_c0_g1	7040	7634	5743	4899	4411	8642
TRINITY_DN52435_c0_g2	242	274	98	116	158	291
TRINITY_DN22842_c0_g1	2	52	18	0	2	41
TRINITY_DN39429_c0_g1	1588	1432	1143	760	436	1272
TRINITY_DN47594_c2_g1	1997	2050	1872	1844	912	2155
TRINITY_DN43577_c0_g1	58	62	132	38	20	144
TRINITY_DN54019_c0_g2	9678	24844	17655	13130	4432	16369
TRINITY_DN43577_c0_g2	131	418	296	147	112	307
TRINITY_DN97758_c0_g1	0	0	3	3	0	0
TRINITY_DN52602_c2_g1	4130	9303	4392	3652	2696	6256
TRINITY_DN66112_c0_g1	6	0	0	0	6	0
TRINITY_DN110466_c0_g1	0	2	0	6	0	0
TRINITY_DN39047_c0_g2	37	30	0	24	52	13
TRINITY_DN90874_c0_g1	0	0	2	0	0	2
TRINITY_DN51833_c3_g2	46	17	18	75	181	10
TRINITY_DN28145_c0_g1	2	33	4	25	16	16
TRINITY_DN21012_c0_g2	8	16	14	0	10	16
TRINITY_DN54939_c5_g1	1173	1713	1401	612	699	1408
TRINITY_DN47231_c0_g2	552	375	386	440	190	404
TRINITY_DN33973_c0_g1	221	202	245	112	32	238
TRINITY_DN50405_c0_g2	8	0	0	0	4	0
TRINITY_DN50405_c0_g1	4736	3852	3814	3689	1482	3667
TRINITY_DN74739_c0_g1	0	2	6	0	4	0
TRINITY_DN54285_c1_g1	1604	990	1221	1392	845	1157
TRINITY_DN39323_c3_g3	1898	1418	750	694	963	1320
TRINITY_DN48324_c0_g2	2802	2422	1464	1363	2325	2439
TRINITY_DN48324_c0_g7	260	4	0	12	215	18
TRINITY_DN48324_c0_g4	333	473	671	363	211	636
TRINITY_DN40282_c1_g1	2091	2530	1567	793	1197	2277
TRINITY_DN39106_c0_g1	1593	892	1030	714	590	615
TRINITY_DN1530_c0_g1	4	16	0	0	0	0
TRINITY_DN60892_c0_g1	0	0	0	0	0	0
TRINITY_DN52864_c0_g4	34	14	6	82	90	12
TRINITY_DN52864_c0_g3	1181	1045	1062	1162	708	1207
TRINITY_DN52864_c0_g1	2895	3015	2476	2133	1179	2161
TRINITY_DN54475_c1_g1	3319	4471	3800	3075	1868	5510
TRINITY_DN54927_c0_g1	184	8	8	10	68	14
TRINITY_DN42629_c3_g1	0	12	2	0	5	2
TRINITY_DN54180_c2_g2	4836	3889	4394	3697	2599	3822
TRINITY_DN39279_c1_g6	66	70	75	13	55	64
TRINITY_DN41936_c0_g3	5527	5165	5777	4913	1917	5279
TRINITY_DN39279_c1_g4	8	26	20	6	20	12
TRINITY_DN39279_c1_g5	5278	4396	5377	4749	2320	5916
TRINITY_DN106272_c0_g1	2	4	2	6	0	22
TRINITY_DN52105_c7_g1	809	895	684	459	356	972
TRINITY_DN53156_c0_g2	5692	6351	6657	6232	2302	6057
TRINITY_DN22447_c0_g2	2	2	0	0	0	4
TRINITY_DN52105_c7_g5	10	66	32	18	22	36
TRINITY_DN53156_c0_g5	0	8	2	0	5	0
TRINITY_DN43465_c0_g1	14	22	8	30	10	28
TRINITY_DN43912_c3_g2	1407	1371	1741	1176	513	1985
TRINITY_DN40407_c0_g2	2557	3021	4256	4851	548	4861
TRINITY_DN44910_c0_g1	236	294	240	62	133	244
TRINITY_DN47001_c1_g1	1782	1577	1381	996	725	1414
TRINITY_DN86716_c0_g1	0	0	0	0	0	0
TRINITY_DN41264_c6_g1	4	12	6	10	14	2
TRINITY_DN34571_c0_g1	750	460	419	543	299	348
TRINITY_DN40774_c3_g1	3470	2766	2618	1916	2174	2961
TRINITY_DN41101_c0_g1	2939	474	602	2985	1158	625
TRINITY_DN53239_c4_g1	24	12	25	13	4	1
TRINITY_DN42100_c5_g5	330	428	563	454	114	426
TRINITY_DN77310_c0_g1	0	0	0	0	0	0
TRINITY_DN41745_c2_g1	175	30	43	134	295	38
TRINITY_DN42660_c0_g1	465	403	371	402	289	279
TRINITY_DN42660_c0_g3	330	306	265	153	253	272
TRINITY_DN42660_c0_g2	373	500	420	203	165	437
TRINITY_DN38798_c0_g1	3417	4599	6200	4035	1969	5016
TRINITY_DN50070_c1_g2	3795	3335	3360	2255	1832	2848
TRINITY_DN73985_c0_g1	0	0	0	0	0	0
TRINITY_DN38465_c1_g1	634	681	483	526	249	598
TRINITY_DN51164_c2_g2	5107	3447	2781	3486	2744	2841
TRINITY_DN45508_c0_g2	7016	8040	8998	8351	4091	9995
TRINITY_DN49495_c1_g1	2715	2430	2751	2717	1221	2634
TRINITY_DN32645_c0_g1	737	1123	815	525	295	432
TRINITY_DN34478_c2_g4	48	50	26	12	31	36
TRINITY_DN34478_c2_g3	278	195	128	214	116	223
TRINITY_DN46940_c0_g5	3495	2952	2403	2086	2068	2797
TRINITY_DN45310_c0_g1	4327	4473	2748	1707	3349	4224
TRINITY_DN49495_c1_g2	74	107	47	128	60	34
TRINITY_DN13542_c0_g1	2	6	2	0	0	0
TRINITY_DN45540_c3_g4	154	299	217	94	136	187
TRINITY_DN47974_c2_g1	3929	2664	2932	2590	1365	3570
TRINITY_DN51324_c2_g1	2501	1075	1256	1039	516	996
TRINITY_DN30272_c0_g1	80	111	58	118	168	72
TRINITY_DN39908_c1_g5	1925	1427	1404	1457	434	1423
TRINITY_DN47308_c2_g1	78	158	84	116	66	170
TRINITY_DN50831_c0_g3	10967	12499	11084	8174	6561	11238
TRINITY_DN73304_c0_g1	10	8	12	12	4	6
TRINITY_DN41140_c1_g8	94	174	179	56	58	179
TRINITY_DN25793_c0_g1	0	0	6	4	10	10
TRINITY_DN39908_c1_g1	435	88	22	208	136	56
TRINITY_DN53976_c2_g1	0	30	8	0	0	26
TRINITY_DN44119_c3_g2	40137	43400	45342	45302	20821	39123
TRINITY_DN45569_c1_g1	0	11	16	0	0	6
TRINITY_DN46227_c2_g3	23830	15189	17864	12900	8970	17418
TRINITY_DN39042_c1_g4	54	40	38	38	30	30
TRINITY_DN30195_c0_g1	77	72	18	32	36	53
TRINITY_DN39310_c1_g2	350	318	174	188	251	284
TRINITY_DN45733_c3_g1	649	719	308	195	205	464
TRINITY_DN36386_c2_g3	2	0	4	0	9	0
TRINITY_DN36386_c2_g2	3178	4795	5228	2663	1769	4514
TRINITY_DN47679_c0_g1	8039	6427	6011	7026	2906	5888
TRINITY_DN49007_c1_g1	6734	6654	6176	5739	4520	6912
TRINITY_DN51306_c1_g2	5929	5819	4056	3893	2377	6821
TRINITY_DN51306_c1_g1	174	367	209	144	104	362
TRINITY_DN108812_c0_g1	36	24	4	6	0	14
TRINITY_DN45452_c2_g1	210	4	0	40	94	0
TRINITY_DN49105_c2_g1	2	3	7	0	14	0
TRINITY_DN1074_c0_g1	118	0	0	84	46	0
TRINITY_DN52930_c4_g3	24808	23688	28323	28727	13915	23511
TRINITY_DN37409_c1_g4	4663	4207	4481	3514	2385	4382
TRINITY_DN34113_c0_g1	408	372	264	202	68	296
TRINITY_DN35836_c0_g1	1698	1563	1731	1472	867	1610
TRINITY_DN41860_c2_g1	292	316	288	386	330	419
TRINITY_DN42440_c1_g1	740	566	380	362	388	645
TRINITY_DN29924_c0_g1	42	14	4	18	24	4
TRINITY_DN106081_c0_g1	0	0	0	12	0	0
TRINITY_DN25740_c2_g1	0	0	0	4	0	5
TRINITY_DN33260_c0_g1	488	179	312	481	118	289
TRINITY_DN36670_c1_g2	32	4	4	16	16	6
TRINITY_DN36670_c1_g1	70	14	8	34	40	0
TRINITY_DN49540_c1_g2	40	0	0	5	12	0
TRINITY_DN49540_c1_g3	1025	940	525	298	246	562
TRINITY_DN49540_c1_g1	312	302	263	184	96	261
TRINITY_DN49111_c3_g1	6	4	0	0	0	0
TRINITY_DN46675_c0_g3	2	0	2	0	0	0
TRINITY_DN46675_c0_g2	183	42	69	48	87	88
TRINITY_DN46675_c0_g1	277	464	434	326	538	542
TRINITY_DN34161_c0_g2	719	1078	668	314	126	752
TRINITY_DN42194_c0_g3	30	24	6	12	12	36
TRINITY_DN45541_c1_g1	1304	1428	1374	1348	796	1377
TRINITY_DN9498_c0_g1	10	4	10	8	4	0
TRINITY_DN54988_c4_g1	1909	1937	1222	710	1010	1873
TRINITY_DN45541_c1_g4	26	28	18	24	10	8
TRINITY_DN53494_c2_g2	4433	3301	2370	2697	2414	3121
TRINITY_DN47176_c0_g1	50	29	34	18	4	2
TRINITY_DN47176_c0_g2	38	36	30	10	4	12
TRINITY_DN110347_c0_g1	0	0	0	0	0	0
TRINITY_DN53494_c2_g4	190	144	187	158	80	180
TRINITY_DN34883_c0_g1	513	353	237	261	246	369
TRINITY_DN79119_c0_g1	0	0	0	3	2	0
TRINITY_DN46165_c4_g1	66	50	12	72	54	34
TRINITY_DN52566_c1_g2	1706	1422	1238	794	1341	1577
TRINITY_DN52566_c1_g3	2	12	4	8	10	8
TRINITY_DN52873_c0_g1	7252	6370	6215	5130	4151	5457
TRINITY_DN44711_c0_g1	436	317	182	146	202	265
TRINITY_DN49569_c1_g1	170	363	196	215	168	296
TRINITY_DN49569_c1_g2	31	37	5	20	49	20
TRINITY_DN68583_c0_g1	9	0	0	6	10	0
TRINITY_DN63571_c0_g1	6	18	16	2	4	6
TRINITY_DN40267_c1_g2	759	1003	424	579	143	244
TRINITY_DN34128_c6_g4	990	602	881	502	283	979
TRINITY_DN40107_c2_g1	165	239	187	171	170	293
TRINITY_DN34128_c6_g1	2013	851	995	659	745	856
TRINITY_DN34128_c6_g2	2866	902	1347	711	1400	883
TRINITY_DN55022_c4_g1	2778	2432	1336	586	2077	1789
TRINITY_DN40736_c2_g1	0	16	2	0	0	14
TRINITY_DN45669_c2_g2	1052	306	302	660	184	254
TRINITY_DN45669_c2_g1	98	16	24	56	103	40
TRINITY_DN40115_c0_g2	934	537	772	521	417	612
TRINITY_DN49527_c0_g1	5862	5061	7699	7107	1515	5690
TRINITY_DN40115_c0_g7	3419	3242	3025	3050	1831	3266
TRINITY_DN52273_c2_g2	12	10	0	26	0	6
TRINITY_DN43023_c0_g2	3024	2855	2535	1767	802	1937
TRINITY_DN43023_c0_g1	277	301	196	138	52	212
TRINITY_DN52273_c2_g1	6729	7387	3561	2457	3352	4235
TRINITY_DN49876_c2_g1	4828	2266	4110	3506	1376	2932
TRINITY_DN39597_c5_g1	0	2	4	2	0	6
TRINITY_DN35871_c0_g1	211	10	12	32	52	34
TRINITY_DN53710_c2_g2	43	77	24	27	23	23
TRINITY_DN39684_c2_g1	4383	4858	3869	3254	1861	4343
TRINITY_DN24003_c0_g1	12	10	9	0	8	22
TRINITY_DN49494_c1_g1	2857	4939	2561	2359	1044	3772
TRINITY_DN49494_c1_g2	3081	2686	2813	2630	1185	3858
TRINITY_DN49494_c1_g3	206	224	135	173	88	156
TRINITY_DN47341_c4_g1	34	52	20	20	45	35
TRINITY_DN46324_c3_g1	551	1524	554	721	435	328
TRINITY_DN37718_c0_g1	376	207	151	117	159	170
TRINITY_DN44655_c1_g1	831	396	419	473	363	530
TRINITY_DN44655_c1_g2	198	327	230	48	166	212
TRINITY_DN37718_c0_g2	615	483	367	181	371	291
TRINITY_DN40732_c8_g1	9041	14730	16172	17291	4520	11127
TRINITY_DN38329_c2_g2	22	6	2	12	2	14
TRINITY_DN50565_c3_g4	297	446	290	149	171	277
TRINITY_DN50565_c3_g7	653	543	358	230	400	470
TRINITY_DN50476_c1_g1	12301	9837	12455	18489	7308	18339
TRINITY_DN12016_c0_g1	108	48	42	42	16	18
TRINITY_DN33837_c1_g1	418	394	504	727	136	302
TRINITY_DN44632_c4_g3	279	152	80	314	167	86
TRINITY_DN5912_c0_g1	0	0	0	0	0	0
TRINITY_DN38171_c0_g3	53	1	15	18	16	25
TRINITY_DN5912_c0_g2	0	0	0	4	0	0
TRINITY_DN51580_c1_g6	807	406	423	318	430	326
TRINITY_DN47891_c1_g1	100	122	91	61	64	101
TRINITY_DN91275_c0_g1	0	3	0	0	0	0
TRINITY_DN44680_c3_g2	4192	2918	3113	1747	865	1878
TRINITY_DN37918_c1_g1	46789	32869	62007	41979	8134	52876
TRINITY_DN37918_c1_g2	228	52	80	26	38	72
TRINITY_DN32451_c0_g1	348	214	308	254	148	210
TRINITY_DN39748_c3_g1	415	329	206	150	160	273
TRINITY_DN45377_c1_g1	28	47	18	25	19	39
TRINITY_DN40225_c2_g1	232	84	54	40	61	55
TRINITY_DN51468_c1_g1	179	58	56	50	76	71
TRINITY_DN42128_c2_g2	35325	29240	38961	34562	13284	31638
TRINITY_DN54446_c3_g3	1815	566	335	407	946	461
TRINITY_DN54446_c3_g2	7162	2423	2754	2528	3968	2534
TRINITY_DN34480_c4_g6	41	150	61	52	92	96
TRINITY_DN42988_c5_g2	5168	5515	6339	4349	1464	6125
TRINITY_DN37801_c2_g1	3366	2517	3270	2707	2164	3438
TRINITY_DN38650_c6_g6	78	188	172	295	90	134
TRINITY_DN37260_c2_g5	28	16	12	8	15	12
TRINITY_DN37260_c2_g2	117	42	38	64	60	62
TRINITY_DN52618_c7_g1	2396	1259	1054	1721	1254	882
TRINITY_DN44814_c1_g2	226	275	245	376	434	356
TRINITY_DN14374_c0_g1	16	4	2	12	8	2
TRINITY_DN43549_c1_g3	190	130	141	164	185	186
TRINITY_DN35502_c0_g3	390	602	458	429	226	672
TRINITY_DN34365_c1_g5	0	0	0	0	8	16
TRINITY_DN34365_c1_g2	64	93	101	141	80	77
TRINITY_DN25080_c0_g1	0	8	8	2	12	20
TRINITY_DN24644_c0_g1	0	4	11	4	0	4
TRINITY_DN45507_c2_g3	4548	3729	3309	8012	2101	3281
TRINITY_DN39553_c0_g3	134	46	28	30	78	52
TRINITY_DN45507_c2_g7	453	429	579	949	234	438
TRINITY_DN50454_c2_g1	4322	3286	4043	2192	1573	3217
TRINITY_DN45477_c3_g1	66	107	76	38	122	59
TRINITY_DN44644_c0_g1	14	135	108	24	8	94
TRINITY_DN48793_c0_g1	8359	14976	12014	7427	3627	8673
TRINITY_DN85716_c0_g1	15	42	38	8	12	28
TRINITY_DN42875_c2_g1	98	10	0	96	240	8
TRINITY_DN62321_c0_g1	0	0	0	0	4	2
TRINITY_DN54080_c3_g1	3658	3491	3946	3365	2055	3792
TRINITY_DN96101_c0_g1	24	4	0	62	78	0
TRINITY_DN51662_c1_g4	500	116	185	292	164	182
TRINITY_DN44634_c0_g1	3395	2520	2585	1914	1291	2495
TRINITY_DN49777_c2_g4	370	236	172	80	161	148
TRINITY_DN41851_c0_g6	40	86	22	36	4	32
TRINITY_DN50523_c3_g1	1129	1258	1164	1086	737	1331
TRINITY_DN50162_c1_g1	1	2	0	4	4	0
TRINITY_DN37336_c6_g1	16	1979	1135	212	36	1232
TRINITY_DN37438_c2_g3	4238	2219	1273	1362	432	1700
TRINITY_DN37486_c2_g2	1870	1834	1672	1677	1080	1478
TRINITY_DN43670_c3_g1	6669	5843	5859	4735	2410	6386
TRINITY_DN22946_c0_g1	142	106	68	124	108	58
TRINITY_DN56520_c0_g1	0	0	0	2	0	0
TRINITY_DN42988_c5_g4	86	139	88	140	172	201
TRINITY_DN54641_c0_g1	4760	4573	2175	1606	2857	5020
TRINITY_DN46723_c4_g3	10	2	0	0	8	0
TRINITY_DN43845_c1_g1	1741	1324	925	627	677	1025
TRINITY_DN46723_c4_g1	916	701	596	485	291	721
TRINITY_DN49173_c0_g2	834	346	166	64	246	220
TRINITY_DN42996_c5_g1	12	6	4	12	8	60
TRINITY_DN37769_c0_g5	0	0	0	0	0	0
TRINITY_DN52162_c3_g1	0	2	0	14	0	0
TRINITY_DN53029_c1_g1	3583	4405	4765	4271	4659	4343
TRINITY_DN43817_c1_g6	2	4	0	0	0	0
TRINITY_DN37769_c0_g1	629	322	222	131	232	278
TRINITY_DN53029_c1_g5	189	424	359	48	119	364
TRINITY_DN37769_c0_g2	534	0	2	70	207	0
TRINITY_DN46314_c0_g1	4407	2598	2339	2184	1252	2797
TRINITY_DN46314_c0_g2	6084	4444	7286	3848	1492	6520
TRINITY_DN37884_c5_g1	1586	1097	1035	1184	1124	1015
TRINITY_DN42731_c1_g1	36	28	50	50	18	40
TRINITY_DN49608_c1_g1	128	160	178	104	16	114
TRINITY_DN53693_c1_g2	66	49	31	22	6	36
TRINITY_DN53693_c1_g3	6855	4698	4608	8004	2716	4139
TRINITY_DN47854_c2_g1	1672	1467	1140	1274	608	1327
TRINITY_DN45378_c0_g9	3265	2069	2130	2489	1907	2190
TRINITY_DN47597_c2_g1	8887	10958	6790	3827	3928	10034
TRINITY_DN52385_c1_g2	14431	13869	10582	6987	9176	15497
TRINITY_DN41007_c1_g5	222	122	148	297	108	218
TRINITY_DN45748_c1_g2	249	225	299	294	176	258
TRINITY_DN45748_c1_g3	10	12	0	14	10	8
TRINITY_DN45748_c1_g4	197	36	26	282	106	32
TRINITY_DN29719_c0_g1	23	89	42	133	95	130
TRINITY_DN38611_c2_g2	1995	2482	1853	1119	1266	1987
TRINITY_DN44306_c2_g1	527	10	5	57	151	6
TRINITY_DN48419_c0_g1	1822	1568	1518	2187	816	1524
TRINITY_DN51278_c6_g1	872	937	841	753	462	1114
TRINITY_DN76534_c0_g1	234	363	305	44	42	320
TRINITY_DN41802_c2_g5	151	1046	649	413	88	1245
TRINITY_DN42225_c1_g2	5	6	22	10	14	18
TRINITY_DN53698_c4_g2	17520	12768	12305	10357	7775	11419
TRINITY_DN50980_c0_g6	0	0	0	0	5	17
TRINITY_DN34867_c3_g2	138	258	84	295	358	208
TRINITY_DN50980_c0_g3	1195	967	724	977	504	1010
TRINITY_DN50980_c0_g1	4938	2930	3310	3513	2366	2887
TRINITY_DN36934_c2_g2	8	36	16	61	26	34
TRINITY_DN52602_c2_g5	31	84	35	94	105	83
TRINITY_DN53871_c6_g1	1003	1413	1376	631	1141	1706
TRINITY_DN53871_c6_g2	4230	3969	2868	2603	2415	4276
TRINITY_DN33658_c1_g1	8	4	2	12	20	4
TRINITY_DN36596_c0_g1	5487	3206	4376	3165	1674	4545
TRINITY_DN36725_c3_g1	33	116	82	58	82	175
TRINITY_DN104712_c0_g1	25	0	16	30	8	20
TRINITY_DN54019_c0_g6	20	0	0	0	12	0
TRINITY_DN41247_c1_g2	24	96	66	11	23	78
TRINITY_DN51387_c2_g2	2318	1533	1223	1301	1596	1430
TRINITY_DN52376_c0_g5	365	243	125	441	604	228
TRINITY_DN27303_c1_g1	0	4	0	0	0	2
TRINITY_DN43839_c1_g5	25	25	6	10	4	6
TRINITY_DN43839_c1_g4	898	167	201	268	392	146
TRINITY_DN35492_c0_g1	108	82	52	109	123	55
TRINITY_DN43839_c1_g2	7	22	13	24	11	9
TRINITY_DN52227_c0_g3	1179	2781	3193	3285	801	3567
TRINITY_DN46378_c3_g1	0	6	0	2	8	2
TRINITY_DN50717_c2_g6	0	0	0	2	0	0
TRINITY_DN50717_c2_g4	22	94	75	36	42	74
TRINITY_DN20970_c0_g1	0	0	0	0	4	0
TRINITY_DN50717_c2_g2	1819	1896	1948	1406	979	2032
TRINITY_DN48837_c4_g6	28953	28876	17226	13380	23598	27997
TRINITY_DN44498_c2_g6	4	4	0	136	6	8
TRINITY_DN44122_c1_g3	4	0	4	28	0	0
TRINITY_DN44498_c2_g2	4076	1988	1930	1548	1820	2625
TRINITY_DN47322_c5_g3	47	98	82	32	30	70
TRINITY_DN44498_c2_g1	6	22	13	2	0	4
TRINITY_DN50825_c0_g3	1468	1057	862	709	200	1007
TRINITY_DN50825_c0_g2	5974	4911	5345	4333	2327	4713
TRINITY_DN50113_c1_g2	18786	16606	14921	12355	7498	14698
TRINITY_DN50350_c9_g1	3024	1947	2018	827	872	2134
TRINITY_DN34434_c3_g2	4918	8265	6919	4899	2210	5387
TRINITY_DN51786_c0_g1	8	4	8	4	0	4
TRINITY_DN47388_c2_g1	2638	4407	3810	2532	536	3776
TRINITY_DN45317_c2_g1	743	840	471	532	534	706
TRINITY_DN49583_c2_g2	4854	1518	1129	263	2779	1171
TRINITY_DN47938_c1_g2	3444	4078	6645	4348	1301	5740
TRINITY_DN47938_c1_g5	257	1073	686	538	144	856
TRINITY_DN47938_c1_g4	258	1304	745	1989	78	871
TRINITY_DN52667_c0_g2	9	22	24	4	4	72
TRINITY_DN38531_c0_g1	317	28	8	156	258	60
TRINITY_DN86752_c0_g1	2	9	10	0	13	18
TRINITY_DN38166_c3_g1	748	721	761	606	216	739
TRINITY_DN41784_c5_g1	269	331	152	306	328	261
TRINITY_DN47740_c0_g6	4	4	4	12	2	4
TRINITY_DN40043_c1_g3	457	463	568	654	370	374
TRINITY_DN40048_c1_g1	257	389	200	405	257	222
TRINITY_DN47740_c0_g2	14729	15875	17523	15001	9000	16736
TRINITY_DN32008_c0_g1	4	5	4	3	3	9
TRINITY_DN13873_c0_g1	5754	5228	3030	4395	1964	3670
TRINITY_DN49548_c0_g1	1882	1863	1960	1369	867	2097
TRINITY_DN45647_c0_g2	810	1009	794	921	239	1107
TRINITY_DN45647_c0_g4	570	349	481	305	573	255
TRINITY_DN54720_c5_g1	5751	4787	3532	2256	971	3935
TRINITY_DN54720_c5_g2	0	2	0	0	2	0
TRINITY_DN44354_c6_g1	18	14	42	8	26	24
TRINITY_DN49902_c0_g2	2811	2007	2076	1340	1366	1919
TRINITY_DN6194_c0_g2	141	0	0	34	29	0
TRINITY_DN54141_c2_g1	0	4	0	2	0	10
TRINITY_DN54141_c2_g2	2717	1572	1719	1275	1247	1835
TRINITY_DN54141_c2_g3	202	383	178	485	10	139
TRINITY_DN54141_c2_g4	784	2476	1157	1026	270	1149
TRINITY_DN40429_c0_g1	213	114	66	119	34	92
TRINITY_DN54141_c2_g6	10	23	14	8	8	2
TRINITY_DN40429_c0_g3	3281	648	372	682	1302	562
TRINITY_DN20379_c0_g2	30	4	4	16	4	0
TRINITY_DN20379_c0_g1	94	54	24	130	67	32
TRINITY_DN52898_c1_g1	490	277	172	60	186	373
TRINITY_DN12527_c0_g1	0	0	0	0	0	0
TRINITY_DN97952_c0_g1	17	16	4	16	2	18
TRINITY_DN43729_c3_g4	502	207	170	336	270	216
TRINITY_DN50422_c0_g1	8689	7998	9963	9707	2442	9970
TRINITY_DN49589_c0_g1	2193	3059	2499	1384	943	2875
TRINITY_DN49589_c0_g2	4044	3347	3778	2755	2121	3329
TRINITY_DN53772_c0_g4	521	187	231	351	413	282
TRINITY_DN50344_c0_g1	1510	998	677	979	626	489
TRINITY_DN50344_c0_g2	284	1583	671	295	67	1215
TRINITY_DN47380_c1_g4	3217	2065	1607	1277	2279	2356
TRINITY_DN47380_c1_g2	4064	2622	1715	1249	2076	2899
TRINITY_DN40485_c3_g2	0	20	15	10	4	8
TRINITY_DN40485_c3_g1	539	637	542	504	212	342
TRINITY_DN41714_c0_g3	2395	2246	2759	2418	1067	2616
TRINITY_DN47931_c6_g1	8	14	4	12	6	0
TRINITY_DN44805_c1_g1	126	139	88	38	106	54
TRINITY_DN48651_c2_g1	193	465	318	380	441	514
TRINITY_DN38211_c0_g5	35	2	16	2	26	2
TRINITY_DN36480_c3_g1	342	330	256	334	212	352
TRINITY_DN31589_c0_g1	184	178	160	116	74	146
TRINITY_DN34390_c2_g3	3875	2454	2912	2471	1387	3118
TRINITY_DN56737_c0_g1	4	0	4	0	2	2
TRINITY_DN42423_c0_g1	614	614	363	110	341	702
TRINITY_DN42423_c0_g4	756	1367	880	171	385	1285
TRINITY_DN42423_c0_g6	6	53	18	49	8	40
TRINITY_DN41248_c0_g2	2533	2556	1962	1479	2110	3234
TRINITY_DN2624_c0_g1	0	0	4	0	0	0
TRINITY_DN34444_c2_g1	16	10	2	2	2	2
TRINITY_DN51865_c3_g3	451	293	204	437	209	287
TRINITY_DN51865_c3_g2	343	126	159	329	206	204
TRINITY_DN37158_c1_g2	30	16	6	0	16	30
TRINITY_DN38380_c0_g3	250	217	213	233	145	305
TRINITY_DN94649_c0_g1	0	2	2	0	2	0
TRINITY_DN34901_c2_g7	131	135	90	64	38	130
TRINITY_DN47503_c1_g5	4606	3771	4648	2793	1367	3968
TRINITY_DN15043_c0_g1	8	0	4	0	4	0
TRINITY_DN35317_c2_g3	214	104	120	539	96	90
TRINITY_DN48731_c1_g1	28	14	16	32	58	12
TRINITY_DN48718_c2_g4	0	433	225	145	0	251
TRINITY_DN26021_c0_g1	6	20	0	10	0	4
TRINITY_DN45853_c0_g1	120	152	118	226	110	142
TRINITY_DN54823_c2_g3	357	449	419	306	314	245
TRINITY_DN48718_c2_g6	306	936	499	217	16	698
TRINITY_DN49598_c2_g1	37355	31840	36944	31939	21598	35202
TRINITY_DN54775_c3_g1	361	377	323	190	82	309
TRINITY_DN42103_c0_g1	42943	31515	42936	37391	12692	40596
TRINITY_DN47112_c0_g1	854	862	870	555	470	1139
TRINITY_DN33866_c2_g1	47	21	16	10	12	32
TRINITY_DN42841_c2_g2	469	357	529	413	223	436
TRINITY_DN50320_c3_g1	5793	5825	4475	3822	2856	4442
TRINITY_DN27733_c0_g1	30	16	8	10	6	10
TRINITY_DN42327_c1_g1	1028	825	743	655	369	710
TRINITY_DN103998_c0_g1	4	0	2	0	0	0
TRINITY_DN46255_c0_g1	0	0	0	0	0	5
TRINITY_DN54995_c27_g1	4291	8	2	1170	2313	0
TRINITY_DN44495_c3_g1	2014	2530	2641	2175	968	2827
TRINITY_DN50672_c0_g2	11748	9448	9180	10615	3247	10606
TRINITY_DN54283_c4_g1	12838	12282	12192	11066	5471	11376
TRINITY_DN54151_c3_g4	4060	4956	3386	1618	2264	4170
TRINITY_DN33743_c2_g7	158	273	211	282	173	286
TRINITY_DN46469_c3_g1	10160	13445	11883	8868	3448	9432
TRINITY_DN35354_c2_g1	174	29	4	75	87	19
TRINITY_DN35354_c2_g3	47	45	68	32	8	45
TRINITY_DN48422_c0_g2	0	0	0	0	0	0
TRINITY_DN48422_c0_g1	104	146	117	247	159	248
TRINITY_DN77850_c0_g1	0	4	2	4	4	8
TRINITY_DN49983_c1_g1	461	2114	1627	3192	359	1685
TRINITY_DN30892_c0_g1	40	73	57	22	100	31
TRINITY_DN35674_c3_g7	6267	6927	8116	6535	2627	6642
TRINITY_DN54230_c2_g3	26454	26298	24334	18986	17743	23654
TRINITY_DN38686_c0_g1	4740	8388	4816	2011	4488	6672
TRINITY_DN54230_c2_g1	4094	3354	2551	2343	1647	2507
TRINITY_DN50349_c1_g1	3720	4335	3782	4092	2050	4229
TRINITY_DN54230_c2_g4	12	4	4	12	28	7
TRINITY_DN43337_c0_g2	0	8	2	0	2	0
TRINITY_DN43337_c0_g1	1842	2055	1980	1669	587	1795
TRINITY_DN42750_c1_g3	3404	3436	3413	3494	1706	3582
TRINITY_DN42750_c1_g1	1786	397	197	1189	243	261
TRINITY_DN42750_c1_g5	207	253	177	206	74	250
TRINITY_DN49491_c3_g1	1716	1668	1859	1931	940	1964
TRINITY_DN50767_c2_g1	2963	2677	3242	1852	1962	3265
TRINITY_DN75829_c0_g1	0	7	10	4	0	0
TRINITY_DN39545_c2_g2	25	91	40	85	40	107
TRINITY_DN34373_c6_g1	611	30	20	12	597	22
TRINITY_DN34373_c6_g5	259	294	199	223	283	269
TRINITY_DN29198_c0_g1	54	62	74	32	70	138
TRINITY_DN41921_c5_g1	0	6	16	12	4	20
TRINITY_DN25938_c0_g1	469	226	104	30	356	158
TRINITY_DN33644_c0_g2	38	53	45	11	104	71
TRINITY_DN33644_c0_g1	0	2	4	0	0	6
TRINITY_DN54882_c0_g1	14	49	34	26	44	48
TRINITY_DN42762_c0_g2	12883	8009	5728	3890	4732	6375
TRINITY_DN44491_c1_g1	1124	1196	985	492	721	1003
TRINITY_DN51354_c6_g1	16	42	22	203	13	62
TRINITY_DN45313_c3_g1	127	98	107	112	276	147
TRINITY_DN41015_c3_g2	300	102	88	266	86	92
TRINITY_DN41015_c3_g1	313	238	240	590	71	184
TRINITY_DN46183_c4_g3	1369	2120	2138	874	844	1447
TRINITY_DN47935_c1_g1	998	369	402	528	414	244
TRINITY_DN47935_c1_g2	684	508	251	434	328	136
TRINITY_DN41015_c3_g8	780	977	1152	1054	1288	464
TRINITY_DN39419_c6_g1	0	4	0	0	0	0
TRINITY_DN53778_c1_g1	1582	2096	2023	1166	622	2341
TRINITY_DN53778_c1_g6	86	108	34	122	162	166
TRINITY_DN53778_c1_g5	0	32	42	8	0	26
TRINITY_DN37250_c2_g7	0	0	0	0	0	0
TRINITY_DN47640_c0_g3	140	106	100	54	64	114
TRINITY_DN39613_c1_g3	1842	1255	1105	1370	537	922
TRINITY_DN39613_c1_g4	2904	2755	2490	1862	1043	2792
TRINITY_DN50876_c2_g2	4085	3681	3939	3548	2048	3707
TRINITY_DN40457_c0_g1	2226	1405	1666	3482	502	2099
TRINITY_DN53944_c0_g1	4	0	0	0	8	0
TRINITY_DN47553_c1_g2	138	209	82	38	32	74
TRINITY_DN86397_c0_g1	0	0	0	2	0	2
TRINITY_DN34852_c0_g1	14	10	0	6	4	4
TRINITY_DN52847_c2_g5	56	8	4	16	26	0
TRINITY_DN49881_c0_g1	500	425	382	697	309	447
TRINITY_DN46744_c1_g1	10483	9243	10890	10250	4137	9360
TRINITY_DN49881_c0_g2	386	263	293	424	314	205
TRINITY_DN45699_c1_g2	2	12	6	0	0	2
TRINITY_DN45699_c1_g1	95	55	62	30	30	38
TRINITY_DN47665_c1_g2	228	605	440	418	397	504
TRINITY_DN36400_c0_g2	797	635	417	570	455	356
TRINITY_DN66640_c0_g1	0	0	0	0	4	0
TRINITY_DN46245_c1_g3	1600	843	891	664	190	811
TRINITY_DN44347_c4_g1	98	137	162	203	94	168
TRINITY_DN60747_c0_g1	0	26	10	4	2	8
TRINITY_DN48382_c2_g1	757	542	426	797	353	402
TRINITY_DN38616_c0_g1	1151	373	145	162	703	308
TRINITY_DN52386_c3_g1	107	281	124	175	171	240
TRINITY_DN52386_c3_g2	29097	31526	23446	20306	25825	30808
TRINITY_DN20498_c0_g1	2442	2508	2943	1701	1182	2494
TRINITY_DN21887_c0_g1	84	143	36	54	0	82
TRINITY_DN37452_c0_g2	1187	973	1250	884	677	1293
TRINITY_DN48331_c1_g1	2	10	2	2	2	0
TRINITY_DN42911_c0_g3	1117	837	1307	1421	406	959
TRINITY_DN4764_c0_g1	0	0	2	0	0	0
TRINITY_DN87268_c0_g1	2	0	0	0	0	0
TRINITY_DN32555_c0_g1	62	14	12	76	36	22
TRINITY_DN48890_c0_g1	1940	1790	1605	1359	1331	2025
TRINITY_DN46984_c1_g4	108	0	0	116	58	0
TRINITY_DN46984_c1_g2	54	10	4	28	38	32
TRINITY_DN46984_c1_g1	410	160	141	97	232	136
TRINITY_DN34193_c0_g2	2027	1058	1079	1486	1616	1121
TRINITY_DN40030_c0_g2	486	190	97	94	203	114
TRINITY_DN40030_c0_g1	795	702	477	223	338	510
TRINITY_DN47441_c3_g1	856	914	1012	714	612	1289
TRINITY_DN45332_c2_g3	2646	2203	2391	1707	1264	2584
TRINITY_DN14453_c0_g1	16	4	12	46	4	36
TRINITY_DN35413_c2_g1	5743	4327	4918	8426	1840	4647
TRINITY_DN27938_c0_g2	2	67	62	0	0	63
TRINITY_DN39215_c1_g5	28	4	6	29	7	10
TRINITY_DN37589_c0_g3	132	126	137	266	56	124
TRINITY_DN37589_c0_g2	72	55	95	46	71	10
TRINITY_DN55086_c18_g1	1305	212	266	331	371	147
TRINITY_DN55086_c18_g2	4255	635	884	1695	1896	614
TRINITY_DN42876_c3_g3	2028	1824	2174	4735	130	2234
TRINITY_DN50579_c0_g2	1292	455	378	417	423	414
TRINITY_DN50579_c0_g1	12888	13881	10506	6428	3294	13876
TRINITY_DN48379_c2_g2	92	127	148	122	14	187
TRINITY_DN42876_c3_g5	270	412	225	292	96	392
TRINITY_DN42876_c3_g4	760	1464	1440	2085	537	1997
TRINITY_DN35350_c5_g1	82	104	34	88	73	34
TRINITY_DN43443_c0_g3	2187	1977	1239	809	943	1807
TRINITY_DN43443_c0_g2	16	18	6	14	26	22
TRINITY_DN52551_c3_g2	2778	3016	2226	957	1598	3022
TRINITY_DN39940_c2_g1	1400	1661	958	1422	658	468
TRINITY_DN46819_c0_g1	306	301	163	235	308	324
TRINITY_DN8158_c0_g1	0	0	0	0	0	0
TRINITY_DN40540_c0_g2	179	328	49	53	36	170
TRINITY_DN54187_c0_g1	76	427	195	417	215	289
TRINITY_DN108304_c0_g1	35	0	0	10	8	0
TRINITY_DN40540_c0_g1	74	107	26	73	14	94
TRINITY_DN22021_c0_g1	50	56	50	54	16	119
TRINITY_DN72152_c0_g1	0	4	0	0	0	0
TRINITY_DN48535_c3_g2	2033	1799	1457	1194	1298	1715
TRINITY_DN29259_c0_g1	18	34	0	4	8	0
TRINITY_DN111235_c0_g1	6	10	0	8	10	0
TRINITY_DN43690_c2_g1	2578	2326	1043	860	1474	1845
TRINITY_DN43395_c3_g3	164	80	66	70	40	86
TRINITY_DN43395_c3_g1	5370	7127	5983	5519	2728	9884
TRINITY_DN40853_c2_g5	2	0	2	0	32	0
TRINITY_DN50337_c2_g2	2159	2795	3563	898	1161	3022
TRINITY_DN57928_c0_g1	0	4	0	0	0	0
TRINITY_DN480_c0_g1	0	26	8	4	0	42
TRINITY_DN47426_c1_g2	161	160	94	392	347	199
TRINITY_DN38243_c0_g1	1601	774	808	1503	1266	742
TRINITY_DN14363_c0_g1	14	6	0	6	2	6
TRINITY_DN40086_c6_g1	1991	1189	866	1299	1329	962
TRINITY_DN42804_c1_g1	1346	1449	1515	1487	565	1316
TRINITY_DN40697_c3_g1	578	336	505	353	190	443
TRINITY_DN40697_c3_g2	62	22	36	18	4	14
TRINITY_DN42269_c0_g1	501	174	266	514	78	170
TRINITY_DN45251_c5_g1	62	100	97	88	72	166
TRINITY_DN54614_c6_g1	5340	4516	3781	2377	1928	3600
TRINITY_DN55057_c9_g3	2616	1235	793	816	1148	982
TRINITY_DN49378_c0_g1	2401	2111	2598	1905	881	2169
TRINITY_DN46614_c4_g1	14941	12966	15232	8825	8083	13345
TRINITY_DN39297_c7_g1	5115	5257	5135	4827	2526	4977
TRINITY_DN41002_c3_g1	1322	1142	1219	1329	402	1496
TRINITY_DN50660_c0_g1	6103	4367	4240	4865	3100	4583
TRINITY_DN54180_c2_g4	64	18	6	22	6	24
TRINITY_DN50277_c3_g3	68	120	43	113	126	120
TRINITY_DN50277_c3_g1	1680	1195	1063	1121	756	845
TRINITY_DN50857_c0_g1	0	4	0	0	2	12
TRINITY_DN36194_c1_g2	348	224	278	240	102	228
TRINITY_DN36194_c1_g1	64	67	66	231	172	88
TRINITY_DN36194_c1_g7	12	0	0	4	0	0
TRINITY_DN36194_c1_g4	96	66	32	120	211	84
TRINITY_DN48313_c0_g1	2724	2048	1355	1063	1357	2009
TRINITY_DN36230_c0_g1	56	51	80	52	22	30
TRINITY_DN48313_c0_g5	88	89	78	115	150	21
TRINITY_DN48313_c0_g6	60	14	24	20	18	44
TRINITY_DN48313_c0_g7	7	0	8	0	6	0
TRINITY_DN50598_c2_g1	2495	1575	1058	1632	1932	1549
TRINITY_DN23841_c0_g1	0	16	38	8	5	24
TRINITY_DN49723_c2_g1	30	17	22	8	80	73
TRINITY_DN39685_c2_g1	576	303	290	674	366	376
TRINITY_DN45712_c1_g3	533	313	319	452	170	112
TRINITY_DN45712_c1_g2	689	427	337	476	407	399
TRINITY_DN20578_c0_g1	34	52	26	10	16	74
TRINITY_DN37597_c4_g5	769	2601	1530	468	664	1750
TRINITY_DN53156_c0_g3	0	42	22	4	2	20
TRINITY_DN44763_c4_g1	602	464	361	327	316	421
TRINITY_DN29791_c0_g1	187	8	0	131	163	4
TRINITY_DN34529_c0_g1	11	5	0	4	14	4
TRINITY_DN32891_c0_g1	180	124	132	72	58	104
TRINITY_DN42193_c1_g2	5099	5294	6011	5141	2090	6578
TRINITY_DN42193_c1_g1	3197	2642	2177	822	1146	1620
TRINITY_DN35455_c4_g1	30	4	2	2	8	0
TRINITY_DN35455_c4_g2	485	12	13	143	183	6
TRINITY_DN46305_c0_g2	24	23	23	12	18	29
TRINITY_DN69982_c0_g1	2	12	8	2	4	21
TRINITY_DN47521_c3_g1	4502	5019	5993	3551	2200	5932
TRINITY_DN37537_c0_g1	736	651	496	930	251	649
TRINITY_DN33602_c0_g1	169	241	157	148	157	256
TRINITY_DN47521_c3_g4	7911	7032	6821	7993	1844	5843
TRINITY_DN45169_c2_g1	512	491	311	397	253	366
TRINITY_DN45169_c2_g2	72	84	46	24	31	91
TRINITY_DN48648_c2_g1	8	14	26	18	16	44
TRINITY_DN40181_c1_g1	85	78	49	45	62	98
TRINITY_DN72388_c0_g1	134	142	169	124	4	253
TRINITY_DN47993_c1_g1	293	129	133	216	90	92
TRINITY_DN41988_c4_g4	124	68	94	88	64	48
TRINITY_DN41988_c4_g1	135	151	91	231	269	133
TRINITY_DN52081_c1_g4	10	0	0	0	8	0
TRINITY_DN41988_c4_g2	273	188	166	267	83	92
TRINITY_DN36839_c2_g1	0	0	0	4	0	0
TRINITY_DN54958_c0_g1	1208	299	296	146	433	493
TRINITY_DN54958_c0_g2	821	318	126	298	300	214
TRINITY_DN39931_c2_g1	8346	6814	7592	5368	2612	7561
TRINITY_DN39931_c2_g3	4	5	4	8	0	38
TRINITY_DN49354_c2_g2	4	0	0	26	18	0
TRINITY_DN38904_c2_g1	20	60	20	13	12	31
TRINITY_DN42289_c4_g2	6	4	0	0	0	0
TRINITY_DN44466_c0_g6	308	302	222	138	146	332
TRINITY_DN54793_c2_g1	4420	3838	2982	1479	3560	4103
TRINITY_DN42289_c4_g1	8	6	0	0	8	0
TRINITY_DN44758_c4_g1	519	416	327	171	366	301
TRINITY_DN32264_c0_g1	265	539	381	468	460	519
TRINITY_DN43912_c3_g1	696	412	358	370	212	487
TRINITY_DN45406_c6_g2	12	9	0	36	4	14
TRINITY_DN29126_c0_g1	34	28	20	14	0	20
TRINITY_DN48172_c4_g1	1152	1278	1370	928	382	1318
TRINITY_DN42623_c3_g8	33	93	34	264	8	20
TRINITY_DN47168_c0_g1	13079	12616	10503	6709	8246	12845
TRINITY_DN53338_c2_g1	6	0	0	0	0	0
TRINITY_DN42623_c3_g6	1590	1611	1779	1936	930	1853
TRINITY_DN42623_c3_g5	364	494	286	116	189	350
TRINITY_DN54795_c9_g4	345	637	444	180	263	562
TRINITY_DN54795_c9_g5	0	339	210	82	0	237
TRINITY_DN54795_c9_g6	4	204	161	96	0	256
TRINITY_DN54795_c9_g7	764	837	527	248	611	792
TRINITY_DN54795_c9_g1	313	679	425	172	236	527
TRINITY_DN54795_c9_g2	1257	1955	1502	669	755	2065
TRINITY_DN54795_c9_g3	834	1662	1094	755	548	1546
TRINITY_DN53772_c0_g3	0	0	4	3	0	4
TRINITY_DN53772_c0_g2	127	44	14	16	38	30
TRINITY_DN53772_c0_g1	604	142	82	135	379	189
TRINITY_DN37818_c1_g1	94	64	42	24	12	56
TRINITY_DN41202_c2_g1	20	99	88	37	16	118
TRINITY_DN48042_c1_g3	2756	2116	2890	2265	1421	3297
TRINITY_DN51097_c0_g1	4964	5538	4350	4174	2206	5587
TRINITY_DN41973_c1_g1	2104	2320	2258	1654	990	2784
TRINITY_DN41973_c1_g2	265	506	586	403	329	530
TRINITY_DN44922_c3_g4	18	2	4	2	12	12
TRINITY_DN41497_c1_g2	157	170	177	56	56	171
TRINITY_DN111044_c0_g1	0	0	0	2	0	4
TRINITY_DN52948_c4_g1	339	73	50	112	403	47
TRINITY_DN50007_c3_g1	28862	24906	30197	27122	11354	30711
TRINITY_DN52948_c4_g2	0	40	48	14	7	85
TRINITY_DN37673_c1_g1	354	211	154	648	882	244
TRINITY_DN54715_c6_g1	0	0	0	0	0	0
TRINITY_DN54769_c5_g1	2400	2434	1130	1223	656	1872
TRINITY_DN37848_c2_g2	3406	2623	1539	206	1695	2141
TRINITY_DN37848_c2_g1	402	162	105	75	121	57
TRINITY_DN54769_c5_g2	12	22	14	0	18	10
TRINITY_DN43927_c2_g1	2401	2364	2403	2266	817	2143
TRINITY_DN43927_c2_g3	89	163	79	53	56	81
TRINITY_DN44047_c0_g1	4	0	0	0	2	0
TRINITY_DN54311_c6_g1	0	16	14	22	0	14
TRINITY_DN44972_c0_g1	0	0	0	0	0	0
TRINITY_DN50315_c2_g1	7299	4799	4919	4897	2634	4058
TRINITY_DN49205_c1_g1	16	41	4	4	4	8
TRINITY_DN49205_c1_g2	3376	2944	2669	1853	1399	3509
TRINITY_DN49205_c1_g3	10378	9273	8193	7646	1261	9413
TRINITY_DN49205_c1_g6	28	48	40	8	18	59
TRINITY_DN40619_c0_g2	793	814	459	540	290	436
TRINITY_DN41513_c2_g2	998	132	395	687	184	224
TRINITY_DN42494_c1_g1	673	417	599	397	287	378
TRINITY_DN44961_c5_g1	4439	5768	5128	4338	2111	4957
TRINITY_DN48563_c1_g1	2242	2074	2585	2646	832	2745
TRINITY_DN41229_c0_g1	569	334	462	402	182	412
TRINITY_DN43663_c1_g1	52	22	12	22	20	20
TRINITY_DN54596_c7_g1	332	316	121	352	84	213
TRINITY_DN36720_c6_g1	887	313	423	318	442	536
TRINITY_DN36030_c4_g3	146	92	88	76	82	202
TRINITY_DN42873_c0_g4	468	430	375	384	265	331
TRINITY_DN52780_c0_g2	2951	4716	3462	2286	1077	2182
TRINITY_DN52780_c0_g5	14	42	8	6	30	0
TRINITY_DN52846_c1_g1	19890	26728	17785	8939	13183	18728
TRINITY_DN39688_c2_g6	3967	2002	3886	3085	1615	3273
TRINITY_DN55023_c0_g4	56	54	36	16	22	34
TRINITY_DN35971_c1_g3	251	159	98	121	187	66
TRINITY_DN47762_c4_g1	234	354	267	478	288	515
TRINITY_DN55023_c0_g1	44	117	192	291	6	221
TRINITY_DN39163_c4_g1	30	0	0	17	14	0
TRINITY_DN55023_c0_g3	30	6	10	12	10	4
TRINITY_DN44303_c0_g1	8	2	2	0	2	16
TRINITY_DN39477_c8_g1	2905	1609	1813	2516	1635	1868
TRINITY_DN39477_c8_g2	2312	1026	600	610	1366	767
TRINITY_DN36264_c1_g5	3165	1929	3492	3552	874	3273
TRINITY_DN37149_c2_g5	73	233	94	48	98	207
TRINITY_DN53540_c0_g1	0	4	0	4	0	6
TRINITY_DN36375_c3_g3	64	84	32	83	207	22
TRINITY_DN37102_c1_g1	70	116	41	59	70	93
TRINITY_DN50071_c0_g1	1622	1493	1473	936	852	1774
TRINITY_DN47789_c3_g4	196	24	78	82	20	18
TRINITY_DN47789_c3_g1	889	306	440	696	454	211
TRINITY_DN45941_c2_g3	145	174	106	154	193	148
TRINITY_DN45941_c2_g1	373	443	382	460	150	364
TRINITY_DN40274_c1_g1	256	146	74	240	134	56
TRINITY_DN47333_c7_g4	34	76	46	51	82	66
TRINITY_DN30660_c0_g1	82	74	88	68	78	96
TRINITY_DN39463_c1_g1	874	663	778	791	320	646
TRINITY_DN39463_c1_g2	566	319	416	321	168	449
TRINITY_DN3157_c0_g1	152	0	0	0	32	0
TRINITY_DN13370_c0_g1	0	0	0	2	0	0
TRINITY_DN98503_c0_g1	0	4	0	0	2	0
TRINITY_DN35153_c0_g1	112	44	46	34	46	44
TRINITY_DN45711_c7_g1	2	0	0	0	0	0
TRINITY_DN49690_c1_g1	116	86	27	169	36	52
TRINITY_DN54798_c6_g1	1460	912	725	701	556	696
TRINITY_DN54798_c6_g2	48	25	6	10	8	21
TRINITY_DN41019_c2_g1	737	1299	1120	673	475	1156
TRINITY_DN41888_c5_g1	12837	9521	12140	9797	6347	11202
TRINITY_DN32385_c0_g1	559	3042	1059	627	520	1318
TRINITY_DN42495_c4_g1	18	90	34	44	14	42
TRINITY_DN48699_c2_g1	1039	765	967	701	375	1246
TRINITY_DN48699_c2_g2	3966	3345	4081	3054	1815	3874
TRINITY_DN48699_c2_g4	4	32	54	54	62	80
TRINITY_DN46219_c1_g1	44	62	40	130	34	70
TRINITY_DN40652_c4_g3	208	187	131	93	134	128
TRINITY_DN31697_c0_g1	16	12	2	0	0	8
TRINITY_DN54510_c1_g1	1048	601	544	667	377	798
TRINITY_DN31697_c0_g2	4	25	16	30	10	29
TRINITY_DN66065_c0_g1	0	0	2	0	10	0
TRINITY_DN36869_c5_g4	22	23	22	16	18	10
TRINITY_DN39618_c0_g3	1992	2199	2519	1296	636	2683
TRINITY_DN111296_c0_g1	24	10	16	8	0	8
TRINITY_DN2354_c0_g1	10	0	0	0	0	0
TRINITY_DN31368_c0_g1	5	2	4	18	3	6
TRINITY_DN53297_c2_g1	2	2	2	2	0	2
TRINITY_DN54917_c2_g1	26	2	0	1	16	0
TRINITY_DN53154_c2_g1	1895	2034	1799	1665	1665	2069
TRINITY_DN54917_c2_g2	136	71	73	106	207	111
TRINITY_DN54917_c2_g4	19	22	20	18	10	54
TRINITY_DN43157_c2_g2	218	116	123	116	182	74
TRINITY_DN47927_c1_g6	0	0	0	0	20	0
TRINITY_DN45025_c2_g2	34	8	2	0	4	0
TRINITY_DN51419_c0_g1	17	4	0	17	10	0
TRINITY_DN45176_c0_g1	2114	1928	1816	1853	843	1832
TRINITY_DN27571_c0_g1	0	26	20	0	0	32
TRINITY_DN38486_c1_g1	178	118	116	371	97	82
TRINITY_DN38486_c1_g2	80	176	176	508	86	68
TRINITY_DN44239_c4_g6	109	32	32	32	82	20
TRINITY_DN38465_c1_g2	3936	3915	3103	2818	1598	3620
TRINITY_DN44239_c4_g2	176	227	146	184	356	171
TRINITY_DN51333_c5_g1	11891	12231	9052	8217	6426	11850
TRINITY_DN45428_c2_g7	996	1372	1646	1144	643	1752
TRINITY_DN54128_c1_g2	0	0	0	0	0	6
TRINITY_DN54128_c1_g3	210	80	46	76	164	72
TRINITY_DN45428_c2_g3	699	964	795	456	256	1142
TRINITY_DN52433_c0_g1	64	74	30	20	4	24
TRINITY_DN39156_c0_g1	2622	2549	2561	2168	1217	1979
TRINITY_DN92786_c0_g1	19	0	0	3	15	0
TRINITY_DN51982_c0_g2	108	99	27	72	157	62
TRINITY_DN39671_c5_g1	5582	5780	5315	4231	3189	6271
TRINITY_DN51982_c0_g3	640	757	533	493	382	683
TRINITY_DN38020_c1_g1	29769	22982	16729	25046	8475	17743
TRINITY_DN30457_c0_g1	0	0	0	0	0	0
TRINITY_DN40177_c0_g2	96	327	205	112	96	374
TRINITY_DN51961_c5_g3	5117	5311	4775	5320	2469	4661
TRINITY_DN40177_c0_g4	61	126	72	26	22	160
TRINITY_DN40177_c0_g7	0	6	4	0	0	0
TRINITY_DN47978_c1_g1	2722	2069	1522	1100	554	1710
TRINITY_DN48550_c3_g1	2068	1997	2327	1679	1010	2618
TRINITY_DN37194_c1_g2	862	1699	1243	915	847	1354
TRINITY_DN40635_c1_g5	4733	2947	4194	1567	1512	3008
TRINITY_DN54412_c2_g3	21	47	69	52	61	31
TRINITY_DN49106_c1_g1	92	82	28	31	66	41
TRINITY_DN49106_c1_g2	48	9	8	0	18	4
TRINITY_DN49106_c1_g3	8	16	6	0	14	2
TRINITY_DN49672_c0_g5	46	92	56	98	102	100
TRINITY_DN40183_c0_g4	3116	2486	2666	2187	988	3566
TRINITY_DN49672_c0_g1	16737	16713	12855	9815	10864	16689
TRINITY_DN43906_c2_g1	365	294	149	307	241	202
TRINITY_DN50063_c7_g1	2963	1800	1948	2398	966	1660
TRINITY_DN43624_c0_g2	847	2377	2232	882	295	1926
TRINITY_DN47094_c1_g1	608	409	404	446	494	342
TRINITY_DN52737_c0_g1	10211	7709	6769	5156	5573	7401
TRINITY_DN52737_c0_g3	148	40	20	12	30	36
TRINITY_DN52737_c0_g2	8	22	68	6	8	38
TRINITY_DN52737_c0_g5	2	4	0	0	0	0
TRINITY_DN43957_c0_g1	20	0	4	18	18	12
TRINITY_DN52737_c0_g6	20	16	18	4	32	8
TRINITY_DN34300_c1_g1	664	611	900	899	366	864
TRINITY_DN53700_c8_g1	148	322	298	73	82	233
TRINITY_DN41085_c2_g1	735	1326	1875	1142	893	1068
TRINITY_DN94606_c0_g1	4	0	2	0	0	4
TRINITY_DN104851_c0_g1	26	46	16	0	0	18
TRINITY_DN58730_c0_g1	94	0	0	6	30	0
TRINITY_DN51064_c9_g2	1899	1328	973	1573	665	1217
TRINITY_DN50685_c1_g1	58	40	22	10	12	52
TRINITY_DN44520_c1_g2	672	540	427	300	284	535
TRINITY_DN48771_c0_g1	76	51	48	66	80	46
TRINITY_DN48771_c0_g2	1326	1312	1407	1293	564	1686
TRINITY_DN54350_c1_g4	0	10	3	2	0	10
TRINITY_DN37141_c5_g4	26	22	48	22	4	24
TRINITY_DN36301_c1_g4	0	2	8	2	20	0
TRINITY_DN54350_c1_g1	370	4019	2747	873	302	3975
TRINITY_DN54350_c1_g2	1712	1004	613	411	148	1035
TRINITY_DN56693_c0_g1	32	8	6	12	10	8
TRINITY_DN43152_c1_g1	22	12	28	6	0	14
TRINITY_DN43152_c1_g2	167	26	9	37	18	28
TRINITY_DN53483_c0_g1	799	533	286	393	375	443
TRINITY_DN41413_c1_g1	20	47	42	8	32	36
TRINITY_DN45159_c4_g1	0	0	0	0	0	0
TRINITY_DN48703_c2_g1	4780	1387	2040	2439	1516	2116
TRINITY_DN37201_c0_g2	392	381	240	116	98	180
TRINITY_DN40413_c1_g2	128	219	124	286	361	350
TRINITY_DN40413_c1_g3	16	56	10	16	122	80
TRINITY_DN19325_c0_g1	0	0	0	0	0	0
TRINITY_DN40413_c1_g5	4	22	4	34	28	8
TRINITY_DN43262_c5_g1	6685	5665	4915	5039	2797	5943
TRINITY_DN46754_c0_g2	7846	7646	5951	5009	2481	7276
TRINITY_DN46754_c0_g4	23	15	13	21	15	21
TRINITY_DN51571_c5_g1	0	61	8	33	0	10
TRINITY_DN107558_c0_g1	0	0	0	14	0	4
TRINITY_DN67717_c0_g1	0	0	0	0	0	0
TRINITY_DN39034_c0_g1	624	429	432	332	301	459
TRINITY_DN36656_c1_g4	228	222	70	70	42	140
TRINITY_DN36656_c1_g2	219	2000	826	2692	191	1208
TRINITY_DN40699_c3_g1	554	326	239	243	247	324
TRINITY_DN54487_c4_g3	1752	348	304	225	1060	263
TRINITY_DN39352_c3_g1	234	154	89	121	129	116
TRINITY_DN44492_c0_g1	0	0	2	0	2	2
TRINITY_DN52111_c2_g3	0	0	0	0	0	0
TRINITY_DN46411_c3_g3	64	26	22	38	28	24
TRINITY_DN65238_c0_g1	5	2	6	4	0	4
TRINITY_DN43246_c0_g1	4655	3520	3975	3338	2094	4671
TRINITY_DN35833_c0_g1	12	6	18	2	0	16
TRINITY_DN39069_c3_g1	137	156	69	129	190	181
TRINITY_DN42390_c1_g1	3262	2536	3373	3249	1415	2963
TRINITY_DN39069_c3_g4	42	12	18	46	2	4
TRINITY_DN39069_c3_g8	56	86	46	88	107	115
TRINITY_DN54034_c6_g1	4	27	7	0	14	9
TRINITY_DN54881_c3_g3	976	1617	1117	928	747	1574
TRINITY_DN52390_c1_g3	207	166	138	130	106	178
TRINITY_DN52390_c1_g2	954	731	709	605	483	740
TRINITY_DN54881_c3_g4	24	8	28	12	24	26
TRINITY_DN54881_c3_g5	48	12	16	6	31	8
TRINITY_DN41178_c0_g5	7430	9862	11029	8898	2455	8989
TRINITY_DN35887_c1_g7	0	0	0	8	0	8
TRINITY_DN37258_c0_g1	539	377	222	259	322	305
TRINITY_DN43105_c4_g2	28	28	20	62	30	22
TRINITY_DN49440_c2_g4	233	451	177	4	149	338
TRINITY_DN49440_c2_g2	754	444	175	293	147	382
TRINITY_DN36315_c1_g1	849	470	450	312	341	209
TRINITY_DN49440_c2_g1	309	304	137	116	122	217
TRINITY_DN34466_c2_g4	430	207	272	234	369	211
TRINITY_DN34466_c2_g2	189	109	116	82	113	154
TRINITY_DN36928_c6_g2	6	30	8	18	14	56
TRINITY_DN53892_c3_g2	4185	571	475	2652	1966	401
TRINITY_DN89977_c0_g1	8	0	2	4	2	2
TRINITY_DN42558_c4_g3	14	22	52	58	8	36
TRINITY_DN5658_c0_g1	0	16	0	0	0	12
TRINITY_DN42558_c4_g5	3299	3076	2189	1496	904	3510
TRINITY_DN50976_c2_g1	3631	2774	2145	1789	2393	2085
TRINITY_DN49172_c4_g2	4673	4084	3560	3161	2393	4148
TRINITY_DN38730_c0_g1	3	70	33	56	48	57
TRINITY_DN52127_c5_g1	8	36	0	6	28	15
TRINITY_DN54539_c5_g1	0	0	0	6	0	6
TRINITY_DN45433_c1_g2	300	248	288	184	233	322
TRINITY_DN25660_c0_g2	0	8	0	4	0	0
TRINITY_DN72963_c0_g1	0	0	0	0	0	0
TRINITY_DN48267_c0_g1	4892	2475	3963	3591	1208	4616
TRINITY_DN53005_c10_g1	40	16	18	46	38	28
TRINITY_DN50040_c1_g1	1084	369	358	1038	967	465
TRINITY_DN47126_c0_g1	1033	1299	949	655	442	1086
TRINITY_DN41832_c0_g1	1731	788	845	785	282	721
TRINITY_DN34337_c1_g2	95	52	15	6	122	66
TRINITY_DN42373_c1_g1	138	710	458	290	203	514
TRINITY_DN44217_c1_g1	0	21	15	15	16	16
TRINITY_DN44833_c4_g1	0	0	0	0	0	0
TRINITY_DN41580_c0_g1	273	147	116	44	132	81
TRINITY_DN34330_c1_g1	130	8	0	0	32	0
TRINITY_DN51190_c1_g1	4037	3719	3446	2689	2184	4219
TRINITY_DN45499_c2_g2	285	420	234	100	175	202
TRINITY_DN46796_c1_g1	1072	1290	1423	562	755	1586
TRINITY_DN46796_c1_g2	414	478	311	143	94	541
TRINITY_DN13421_c0_g1	14	0	0	4	0	0
TRINITY_DN13421_c0_g2	6	0	0	0	0	0
TRINITY_DN41731_c5_g1	29053	25209	13509	8760	18867	23263
TRINITY_DN53596_c1_g1	896	6	24	264	332	8
TRINITY_DN7869_c0_g1	2	0	0	0	0	0
TRINITY_DN37384_c0_g3	20	42	48	32	18	80
TRINITY_DN48158_c1_g1	36	8	6	4	30	8
TRINITY_DN48133_c2_g3	369	868	560	255	205	1048
TRINITY_DN78976_c0_g1	0	8	0	0	8	4
TRINITY_DN38193_c1_g1	54	66	18	92	101	68
TRINITY_DN53551_c2_g2	106	70	62	84	18	40
TRINITY_DN53551_c2_g1	1010	580	397	526	283	720
TRINITY_DN72481_c0_g1	0	0	0	0	0	0
TRINITY_DN54008_c1_g5	2004	1723	1422	1413	477	1421
TRINITY_DN28445_c0_g2	18	29	16	10	14	65
TRINITY_DN53344_c7_g1	4	49	47	46	38	93
TRINITY_DN50266_c1_g2	0	24	22	0	2	12
TRINITY_DN37771_c1_g3	5078	4575	5842	5057	1900	4441
TRINITY_DN54904_c6_g2	4357	2462	2102	1788	2242	2245
TRINITY_DN53344_c7_g5	9	4	0	0	5	0
TRINITY_DN37771_c1_g4	5631	3646	5116	5014	2111	5343
TRINITY_DN53344_c7_g7	0	26	26	0	0	10
TRINITY_DN22819_c0_g1	8	58	16	18	10	44
TRINITY_DN84062_c0_g1	6	5376	2562	0	10	2040
TRINITY_DN49604_c1_g1	214	50	29	83	107	30
TRINITY_DN27768_c0_g1	0	14	0	0	0	0
TRINITY_DN45569_c1_g2	35	8	24	4	0	24
TRINITY_DN34509_c0_g1	1084	1001	1619	1047	365	1128
TRINITY_DN34509_c0_g2	1208	1031	1068	953	77	846
TRINITY_DN48842_c1_g10	25	208	62	4	3	150
TRINITY_DN31760_c0_g1	22	17	6	0	2	4
TRINITY_DN45114_c0_g2	86	106	30	63	130	86
TRINITY_DN45114_c0_g3	5803	4864	5036	4948	2445	5415
TRINITY_DN54410_c1_g1	466	534	337	403	811	656
TRINITY_DN53645_c4_g1	570	640	633	392	178	816
TRINITY_DN46700_c1_g2	1157	1104	1395	1203	773	1541
TRINITY_DN50658_c4_g1	1258	1263	1136	840	282	1161
TRINITY_DN38534_c2_g1	494	211	384	320	206	393
TRINITY_DN43568_c10_g2	1623	1544	1853	1061	842	1679
TRINITY_DN54364_c3_g1	4217	3903	4076	7467	1309	6401
TRINITY_DN50905_c7_g1	468	436	236	407	476	330
TRINITY_DN38809_c2_g4	77	33	45	89	129	75
TRINITY_DN47882_c2_g2	6660	6273	6263	5411	4237	6174
TRINITY_DN47882_c2_g1	113	99	144	39	76	111
TRINITY_DN53576_c0_g1	0	0	0	0	0	2
TRINITY_DN53636_c6_g3	1093	1040	1182	1056	652	1147
TRINITY_DN52277_c1_g2	30	28	12	8	4	27
TRINITY_DN52277_c1_g1	16897	12727	13201	12114	8727	14450
TRINITY_DN47984_c1_g3	6264	5868	3140	2583	2481	4739
TRINITY_DN47680_c5_g1	490	682	352	219	318	621
TRINITY_DN49660_c1_g5	2	12	4	4	0	0
TRINITY_DN49660_c1_g3	9182	8479	9990	10070	3667	9615
TRINITY_DN49660_c1_g1	538	699	756	830	259	787
TRINITY_DN37307_c4_g2	797	708	788	556	165	556
TRINITY_DN49887_c1_g1	1254	784	573	644	1274	990
TRINITY_DN40384_c0_g1	923	491	362	675	735	502
TRINITY_DN51800_c3_g2	531	1104	1118	689	862	1040
TRINITY_DN37750_c1_g5	1250	1094	1313	1096	486	1314
TRINITY_DN51800_c3_g5	60	34	74	28	2	34
TRINITY_DN43230_c2_g4	1758	3792	1597	945	210	2766
TRINITY_DN52697_c1_g1	3477	3167	2469	2952	1901	2690
TRINITY_DN45455_c1_g3	19	126	60	78	66	44
TRINITY_DN52697_c1_g3	4	34	30	4	2	42
TRINITY_DN43840_c0_g1	848	473	497	582	401	358
TRINITY_DN37133_c2_g3	4279	4148	4434	3813	2044	4476
TRINITY_DN41082_c1_g1	8394	7590	6764	7319	2096	6551
TRINITY_DN55821_c0_g1	6	2	0	0	0	0
TRINITY_DN42759_c0_g3	1220	687	678	690	258	797
TRINITY_DN45292_c0_g3	346	387	349	349	201	451
TRINITY_DN50631_c0_g1	290	239	182	220	251	297
TRINITY_DN45256_c1_g2	412	483	399	612	167	470
TRINITY_DN38457_c0_g3	3208	2284	2383	2881	1302	1931
TRINITY_DN45256_c1_g4	334	440	288	687	76	172
TRINITY_DN9430_c0_g1	16	0	0	16	0	6
TRINITY_DN9430_c0_g2	0	0	4	0	0	10
TRINITY_DN48408_c4_g1	584	288	212	508	422	279
TRINITY_DN22480_c0_g1	384	985	583	318	112	398
TRINITY_DN31727_c0_g1	246	106	150	108	134	124
TRINITY_DN45607_c1_g1	1285	879	731	687	458	925
TRINITY_DN27097_c0_g1	0	8	2	0	0	12
TRINITY_DN36962_c0_g1	106	218	146	243	225	223
TRINITY_DN37043_c1_g1	758	723	733	697	543	770
TRINITY_DN107015_c0_g1	4	0	0	2	0	0
TRINITY_DN47668_c0_g1	545	629	868	603	221	959
TRINITY_DN40868_c1_g4	12	5	8	4	0	0
TRINITY_DN40868_c1_g2	1114	591	337	845	937	493
TRINITY_DN37840_c3_g1	5059	11600	6361	3188	1613	6614
TRINITY_DN37840_c3_g2	614	264	338	514	83	262
TRINITY_DN40868_c1_g1	864	3535	1888	476	713	2758
TRINITY_DN42004_c2_g2	477	225	124	269	259	220
TRINITY_DN42004_c2_g1	12	30	48	2	26	14
TRINITY_DN43423_c1_g1	40	124	29	71	86	65
TRINITY_DN44448_c2_g1	1654	670	623	500	909	647
TRINITY_DN41342_c1_g4	21	30	22	46	16	38
TRINITY_DN53362_c2_g1	3610	3497	3566	4090	1347	3011
TRINITY_DN41342_c1_g3	1359	1521	1403	1366	345	1072
TRINITY_DN41342_c1_g1	773	588	237	591	305	415
TRINITY_DN50497_c3_g7	43	2	10	3	24	17
TRINITY_DN50497_c3_g4	114	100	56	36	126	32
TRINITY_DN50497_c3_g3	205	61	94	57	90	116
TRINITY_DN34570_c0_g1	6599	5923	7395	6533	1994	7141
TRINITY_DN50497_c3_g1	1061	506	468	525	1013	679
TRINITY_DN31518_c0_g1	36	66	26	12	32	91
TRINITY_DN38105_c2_g1	260	382	212	40	12	302
TRINITY_DN53390_c2_g1	13298	10227	9562	14015	4230	10647
TRINITY_DN45575_c3_g1	197	439	183	551	501	447
TRINITY_DN53390_c2_g3	22	8	4	8	10	4
TRINITY_DN49236_c1_g3	26	12	41	24	24	8
TRINITY_DN32520_c0_g1	819	733	1016	793	180	740
TRINITY_DN34595_c0_g5	126	188	187	114	119	282
TRINITY_DN49075_c0_g1	2409	2081	1849	974	1057	2112
TRINITY_DN40161_c3_g2	1011	615	760	819	629	997
TRINITY_DN49300_c0_g1	2594	2585	2477	2167	1917	2671
TRINITY_DN54262_c5_g1	1149	1328	1352	1096	805	1559
TRINITY_DN48330_c7_g1	1804	1874	2017	1782	1080	1752
TRINITY_DN46294_c0_g3	147	24	14	0	74	26
TRINITY_DN47280_c3_g2	222	94	138	116	394	150
TRINITY_DN45651_c2_g4	711	202	231	49	630	259
TRINITY_DN39144_c3_g1	1243	1278	1094	853	410	1436
TRINITY_DN109993_c0_g1	40	50	27	18	19	63
TRINITY_DN35490_c6_g2	462	126	100	22	106	102
TRINITY_DN42059_c0_g3	5065	7063	11501	7165	1500	14095
TRINITY_DN55103_c4_g1	14	44	20	24	4	16
TRINITY_DN28807_c0_g1	26	29	20	32	0	20
TRINITY_DN33073_c0_g2	54	110	64	109	29	78
TRINITY_DN16327_c0_g1	18	0	0	0	6	0
TRINITY_DN47645_c0_g1	26858	27314	25535	31059	9600	23535
TRINITY_DN52026_c0_g1	4461	4421	4304	3931	2354	5289
TRINITY_DN52026_c0_g3	115	274	116	188	199	378
TRINITY_DN47645_c0_g6	15998	11430	13082	10039	12388	12054
TRINITY_DN104209_c0_g1	0	0	0	0	0	0
TRINITY_DN43278_c7_g1	238	163	59	258	149	222
TRINITY_DN49081_c5_g1	114	8	0	2	24	0
TRINITY_DN2075_c0_g1	0	0	0	58	0	0
TRINITY_DN33662_c0_g1	209	521	438	341	86	308
TRINITY_DN54848_c5_g1	7826	8507	4997	3372	5903	6852
TRINITY_DN50715_c1_g1	830	607	534	368	495	602
TRINITY_DN53635_c2_g3	16	0	0	13	16	0
TRINITY_DN38380_c0_g2	6749	6555	8955	7715	2287	8516
TRINITY_DN53635_c2_g1	4289	3405	2773	1943	2754	2966
TRINITY_DN41064_c0_g6	401	304	267	296	156	278
TRINITY_DN22672_c0_g1	14	0	0	0	30	4
TRINITY_DN51758_c3_g2	156	134	146	56	116	171
TRINITY_DN51758_c3_g3	3	88	64	4	22	157
TRINITY_DN38781_c7_g5	176	181	236	123	128	258
TRINITY_DN38935_c5_g2	1247	1530	1299	639	773	1583
TRINITY_DN38935_c5_g3	0	2	0	10	4	20
TRINITY_DN26240_c0_g1	0	84	40	66	20	78
TRINITY_DN47905_c0_g1	200	0	0	2	40	8
TRINITY_DN64276_c0_g1	18	0	4	0	14	4
TRINITY_DN46800_c2_g1	240	96	46	28	96	44
TRINITY_DN33486_c1_g4	2780	2723	3208	2503	1027	2950
TRINITY_DN48097_c3_g3	2460	3068	2799	1815	1352	2540
TRINITY_DN33486_c1_g3	74	156	56	56	60	83
TRINITY_DN15225_c0_g1	6	4	0	6	8	2
TRINITY_DN55106_c13_g1	6	4	0	10	18	12
TRINITY_DN34730_c0_g1	804	1657	1895	1629	386	1460
TRINITY_DN97781_c0_g1	0	0	0	0	0	4
TRINITY_DN74771_c0_g1	0	0	0	2	8	0
TRINITY_DN51957_c1_g2	0	192	111	34	0	147
TRINITY_DN51957_c1_g1	937	631	412	572	864	581
TRINITY_DN49939_c1_g1	573	325	178	1056	468	218
TRINITY_DN47187_c1_g3	2681	1338	1120	1598	1609	1374
TRINITY_DN50740_c4_g4	46630	43263	46436	41114	27013	37234
TRINITY_DN47187_c1_g1	4279	3873	3606	3157	2670	4539
TRINITY_DN50073_c1_g1	4680	1465	2386	1568	1641	1977
TRINITY_DN93855_c0_g1	0	2	0	0	4	2
TRINITY_DN49151_c1_g1	90	1214	1039	481	118	984
TRINITY_DN52781_c2_g1	85	316	364	308	134	417
TRINITY_DN54472_c3_g1	917	4156	2427	1820	778	3733
TRINITY_DN43470_c1_g2	5338	3722	2886	1508	4756	3809
TRINITY_DN42097_c2_g2	1213	961	671	760	568	1139
TRINITY_DN35166_c2_g1	112	291	200	182	146	197
TRINITY_DN84622_c0_g1	0	0	0	0	0	0
TRINITY_DN48048_c1_g2	729	322	180	861	231	155
TRINITY_DN32409_c0_g1	14	38	6	4	8	26
TRINITY_DN38009_c0_g1	0	425	335	251	4	361
TRINITY_DN38009_c0_g3	1183	2038	1295	265	552	1266
TRINITY_DN46987_c2_g2	40	24	24	44	44	32
TRINITY_DN54910_c4_g1	3912	3225	3330	2573	1449	3580
TRINITY_DN53508_c7_g8	50	70	51	18	14	77
TRINITY_DN47813_c0_g2	358	283	134	105	38	178
TRINITY_DN47813_c0_g1	3106	3564	3296	3154	899	3447
TRINITY_DN53508_c7_g1	1080	194	196	561	245	306
TRINITY_DN52718_c0_g1	17761	17057	17522	14658	7354	20142
TRINITY_DN53508_c7_g5	72	50	32	12	20	64
TRINITY_DN46841_c2_g4	7450	7062	7198	8029	2778	3732
TRINITY_DN34614_c4_g2	600	445	365	725	257	334
TRINITY_DN46841_c2_g3	774	590	651	670	398	772
TRINITY_DN36132_c1_g1	0	0	0	145	2	0
TRINITY_DN46841_c2_g1	17720	11499	13337	22865	8048	10969
TRINITY_DN48087_c4_g6	14	66	26	12	16	62
TRINITY_DN48087_c4_g1	2938	2241	2045	2519	1239	2666
TRINITY_DN48087_c4_g3	9663	7400	10205	6997	3408	8826
TRINITY_DN50928_c0_g1	1219	6561	4303	3397	941	5585
TRINITY_DN46944_c2_g4	3	4	4	16	12	14
TRINITY_DN41460_c1_g1	1030	1351	1197	883	567	1140
TRINITY_DN41460_c1_g3	1046	873	1014	780	661	1231
TRINITY_DN41460_c1_g5	26	4	20	12	26	14
TRINITY_DN47555_c1_g1	74	210	83	212	183	163
TRINITY_DN33591_c0_g1	589	1610	654	581	475	592
TRINITY_DN38610_c2_g3	62	36	8	96	34	20
TRINITY_DN38610_c2_g2	365	156	158	106	158	148
TRINITY_DN38610_c2_g1	3071	4048	3654	1777	1708	3161
TRINITY_DN99975_c0_g1	2	0	0	0	0	0
TRINITY_DN47687_c1_g1	0	0	0	0	0	0
TRINITY_DN44481_c3_g3	1777	1567	1681	1290	1039	1744
TRINITY_DN45514_c2_g1	3298	3827	3861	3752	1692	3533
TRINITY_DN50639_c8_g1	0	0	0	0	2	0
TRINITY_DN40745_c5_g1	0	0	0	0	0	0
TRINITY_DN40930_c5_g2	1146	696	1051	837	593	1057
TRINITY_DN52279_c1_g5	38	10	12	72	24	18
TRINITY_DN52279_c1_g4	32	6	10	34	14	5
TRINITY_DN52279_c1_g1	4271	3890	4770	3416	3301	4612
TRINITY_DN52279_c1_g3	20	62	8	104	2	28
TRINITY_DN52279_c1_g2	3851	941	565	611	2701	627
TRINITY_DN45701_c6_g1	292	377	175	190	234	530
TRINITY_DN40965_c2_g1	28	49	58	40	21	74
TRINITY_DN50949_c1_g1	1100	670	781	559	591	847
TRINITY_DN36981_c1_g13	209	10	58	8	144	18
TRINITY_DN36464_c4_g1	154	129	124	87	18	146
TRINITY_DN36464_c4_g2	623	501	351	372	327	612
TRINITY_DN48949_c2_g1	50	114	58	47	35	96
TRINITY_DN39862_c2_g1	1518	1635	1084	724	1082	771
TRINITY_DN48346_c3_g1	144	118	118	56	52	42
TRINITY_DN45347_c3_g1	1298	918	1454	1198	884	1582
TRINITY_DN49209_c2_g3	0	0	0	0	0	0
TRINITY_DN41528_c10_g2	694	708	610	1528	255	622
TRINITY_DN50641_c1_g3	1316	503	706	635	442	740
TRINITY_DN50641_c1_g1	1285	1688	1101	679	277	1134
TRINITY_DN94314_c0_g1	2	0	0	0	0	0
TRINITY_DN50670_c2_g3	496	363	312	217	56	388
TRINITY_DN46736_c3_g1	12698	5328	3491	4831	2010	5435
TRINITY_DN53416_c1_g5	128	170	140	143	28	86
TRINITY_DN45346_c1_g2	12	13	32	18	4	5
TRINITY_DN53416_c1_g1	42	78	47	40	10	81
TRINITY_DN53416_c1_g3	103	132	95	121	20	82
TRINITY_DN45346_c1_g3	130	150	132	110	306	184
TRINITY_DN49305_c2_g1	50	223	203	59	48	147
TRINITY_DN38218_c2_g1	140	68	94	110	50	92
TRINITY_DN45486_c2_g3	605	1099	959	475	341	732
TRINITY_DN31268_c0_g1	86	56	46	96	104	140
TRINITY_DN52244_c2_g1	939	1114	1142	717	306	1043
TRINITY_DN45346_c1_g1	3190	2181	2103	2196	1019	2274
TRINITY_DN45885_c3_g1	4	2	0	0	0	4
TRINITY_DN52732_c0_g2	4033	3577	3569	2683	1705	3481
TRINITY_DN52732_c0_g3	28	7	16	6	12	22
TRINITY_DN82276_c0_g1	2	8	0	6	0	8
TRINITY_DN33811_c0_g1	320	154	320	272	174	148
TRINITY_DN42406_c2_g2	625	550	390	232	102	509
TRINITY_DN32087_c0_g1	188	126	120	216	44	150
TRINITY_DN47781_c2_g1	746	660	559	478	410	552
TRINITY_DN43673_c4_g4	6	24	24	18	4	40
TRINITY_DN43673_c4_g1	73	70	103	6	47	121
TRINITY_DN43746_c1_g12	57	30	24	69	135	62
TRINITY_DN48781_c2_g2	4624	5196	5043	4047	1656	3838
TRINITY_DN47573_c2_g1	6969	6740	7228	4906	1753	7891
TRINITY_DN50979_c4_g1	14	0	0	6	4	0
TRINITY_DN37025_c2_g1	4	4	4	0	0	4
TRINITY_DN53546_c0_g1	74147	75700	92317	89503	22787	77568
TRINITY_DN53546_c0_g2	1031	613	683	696	344	682
TRINITY_DN83976_c0_g1	0	0	0	0	0	0
TRINITY_DN30953_c0_g1	1071	803	802	754	382	716
TRINITY_DN51596_c0_g1	6737	8718	8066	4439	2292	12289
TRINITY_DN53033_c2_g3	274	20	28	21	156	56
TRINITY_DN53033_c2_g2	0	223	310	6	0	340
TRINITY_DN33673_c0_g1	152	156	74	134	98	40
TRINITY_DN42265_c0_g1	385	252	221	158	294	297
TRINITY_DN48433_c1_g1	85	0	0	0	16	0
TRINITY_DN42908_c0_g1	1538	912	664	328	683	734
TRINITY_DN50961_c1_g1	3533	3068	3028	4545	1721	2829
TRINITY_DN53536_c0_g1	27	23	10	18	15	19
TRINITY_DN53536_c0_g3	12	4	0	0	0	0
TRINITY_DN53536_c0_g2	3090	2695	2177	1718	1604	2492
TRINITY_DN19459_c0_g1	2	10	0	2	2	8
TRINITY_DN45578_c2_g1	501	340	306	168	152	334
TRINITY_DN45700_c1_g4	263	133	128	120	46	77
TRINITY_DN45700_c1_g6	908	992	1359	1118	385	1240
TRINITY_DN49738_c2_g1	5629	16954	6744	7337	2823	7666
TRINITY_DN49738_c2_g2	2373	5524	3071	4299	777	2866
TRINITY_DN45700_c1_g3	14035	9462	11597	10310	4949	10709
TRINITY_DN52974_c2_g1	82	28	12	0	68	34
TRINITY_DN54988_c4_g5	0	2	3	2	1	7
TRINITY_DN40212_c2_g3	526	441	252	38	390	347
TRINITY_DN40760_c0_g2	196	197	186	152	58	148
TRINITY_DN40212_c2_g4	34	98	90	171	38	112
TRINITY_DN40212_c2_g5	170	177	150	131	124	165
TRINITY_DN40212_c2_g8	758	995	768	346	340	984
TRINITY_DN40212_c2_g9	53	113	57	124	158	81
TRINITY_DN37250_c3_g1	175	192	124	108	106	127
TRINITY_DN44719_c1_g3	6	10	14	16	0	10
TRINITY_DN44719_c1_g2	185	190	181	445	88	276
TRINITY_DN37250_c3_g5	54	0	0	0	6	0
TRINITY_DN44719_c1_g4	702	359	420	446	292	505
TRINITY_DN37250_c3_g6	4	34	16	12	14	4
TRINITY_DN54258_c3_g1	6851	11232	11988	10066	3978	12818
TRINITY_DN48888_c2_g1	4613	4210	4336	3629	2510	4016
TRINITY_DN48888_c2_g2	16	6	0	18	4	0
TRINITY_DN38710_c0_g3	844	890	459	602	224	487
TRINITY_DN36240_c2_g2	765	1138	979	892	502	1097
TRINITY_DN36240_c2_g3	439	296	385	261	352	272
TRINITY_DN37437_c0_g1	0	0	0	0	0	0
TRINITY_DN43016_c2_g2	909	723	489	1067	433	706
TRINITY_DN33590_c0_g1	68	113	56	22	42	90
TRINITY_DN48010_c3_g4	45	42	35	49	20	21
TRINITY_DN1756_c0_g1	0	9	7	44	4	27
TRINITY_DN46705_c3_g2	209	257	185	185	21	210
TRINITY_DN46705_c3_g1	102	34	36	139	6	38
TRINITY_DN32199_c0_g2	123	100	110	66	56	94
TRINITY_DN74561_c0_g1	0	46	42	0	0	77
TRINITY_DN47180_c6_g1	4798	5281	5149	3249	1098	7980
TRINITY_DN44222_c0_g1	0	0	0	32	0	0
TRINITY_DN1610_c0_g1	0	0	0	2	0	0
TRINITY_DN39305_c1_g2	99	213	79	383	44	302
TRINITY_DN39305_c1_g3	9	7	2	0	0	14
TRINITY_DN39305_c1_g1	647	247	160	290	328	330
TRINITY_DN48706_c1_g1	1022	1554	1478	720	574	1668
TRINITY_DN29943_c0_g1	254	196	166	84	86	110
TRINITY_DN53439_c4_g5	222	276	319	202	29	204
TRINITY_DN47370_c1_g7	453	376	334	316	193	429
TRINITY_DN47370_c1_g4	28	28	6	26	80	36
TRINITY_DN43689_c0_g1	17	32	34	48	20	22
TRINITY_DN43027_c0_g1	599	625	712	889	193	740
TRINITY_DN72431_c0_g1	4	0	0	0	2	0
TRINITY_DN46365_c0_g1	1278	2344	1053	714	735	1290
TRINITY_DN41701_c4_g2	735	478	838	1009	307	534
TRINITY_DN51675_c1_g1	4872	2754	2889	2699	1984	2430
TRINITY_DN51972_c5_g5	710	511	470	162	444	571
TRINITY_DN41438_c1_g1	246	943	536	429	164	373
TRINITY_DN29097_c0_g1	42	32	0	14	16	6
TRINITY_DN36277_c6_g1	500	173	252	288	224	202
TRINITY_DN43496_c1_g1	0	8	8	8	0	11
TRINITY_DN48529_c3_g2	522	303	173	120	244	249
TRINITY_DN50101_c1_g5	557	567	361	243	265	623
TRINITY_DN34826_c0_g1	710	364	651	306	396	393
TRINITY_DN52826_c2_g1	43	43	34	26	52	65
TRINITY_DN50101_c1_g1	841	755	524	434	337	654
TRINITY_DN50101_c1_g3	29	33	47	8	1	34
TRINITY_DN50101_c1_g2	12	0	0	12	0	27
TRINITY_DN46431_c2_g3	2850	1615	1493	3158	1146	791
TRINITY_DN36943_c0_g3	3531	121	121	905	1349	56
TRINITY_DN47949_c2_g1	2881	2502	2666	2585	1505	2406
TRINITY_DN40819_c0_g6	36	19	20	220	15	38
TRINITY_DN865_c0_g1	38	4	8	4	30	20
TRINITY_DN55058_c6_g1	1058	2467	1065	1419	492	764
TRINITY_DN39734_c3_g1	140	12	4	252	102	0
TRINITY_DN108901_c0_g1	18	65	17	26	2	24
TRINITY_DN44247_c1_g5	72	44	6	8	32	50
TRINITY_DN13862_c0_g1	198	42	42	114	55	36
TRINITY_DN47204_c2_g1	4980	4848	4053	3875	3235	4335
TRINITY_DN47501_c0_g2	4	30	14	18	4	12
TRINITY_DN105710_c0_g1	0	0	0	0	2	0
TRINITY_DN48497_c1_g1	4392	3635	2940	2578	867	2648
TRINITY_DN113931_c0_g1	2	2	0	0	0	0
TRINITY_DN46435_c0_g4	44	32	28	38	15	26
TRINITY_DN16849_c0_g1	42	6	14	12	38	8
TRINITY_DN45798_c1_g1	9315	35	17	2862	4012	22
TRINITY_DN49313_c1_g1	2978	2325	2704	2503	1568	2363
TRINITY_DN49313_c1_g2	311	211	135	195	135	191
TRINITY_DN49111_c6_g6	12	20	2	0	4	28
TRINITY_DN49313_c1_g5	48	32	37	90	68	37
TRINITY_DN49111_c6_g2	427	482	476	171	355	515
TRINITY_DN55001_c0_g2	0	8	8	4	0	34
TRINITY_DN36476_c2_g4	58	25	65	62	8	43
TRINITY_DN54500_c3_g2	13974	1412	1369	5945	8234	1364
TRINITY_DN33678_c8_g1	697	848	443	865	399	554
TRINITY_DN39155_c0_g4	15111	10083	10585	11456	3945	7547
TRINITY_DN39155_c0_g5	732	404	416	568	472	453
TRINITY_DN54847_c5_g1	24	0	10	0	14	0
TRINITY_DN53190_c1_g2	82	72	104	58	27	155
TRINITY_DN44043_c1_g1	878	134	28	221	550	201
TRINITY_DN47429_c1_g1	1656	221	100	145	703	84
TRINITY_DN48062_c6_g1	6199	6149	5268	4298	2082	5745
TRINITY_DN26762_c0_g1	16	0	0	0	0	0
TRINITY_DN48086_c3_g3	681	568	435	371	541	630
TRINITY_DN35709_c0_g1	3175	3420	2419	1786	1048	3059
TRINITY_DN35709_c0_g3	2	2	0	82	0	4
TRINITY_DN35709_c0_g2	211	106	52	177	44	77
TRINITY_DN33069_c0_g2	12	12	6	4	32	4
TRINITY_DN105672_c0_g1	4	16	4	0	0	8
TRINITY_DN112112_c0_g1	4	0	2	6	4	0
TRINITY_DN37940_c3_g1	677	520	742	370	242	666
TRINITY_DN53832_c3_g1	2794	2001	1341	3056	1229	1611
TRINITY_DN49713_c0_g1	1524	1283	1218	1034	781	1515
TRINITY_DN95700_c0_g1	26	36	33	0	28	56
TRINITY_DN53832_c3_g4	65	44	34	146	42	63
TRINITY_DN41621_c1_g1	10	0	0	4	0	0
TRINITY_DN39661_c3_g1	1025	708	602	520	511	760
TRINITY_DN28427_c0_g1	0	8	16	2	8	10
TRINITY_DN37810_c4_g1	0	4	0	0	0	0
TRINITY_DN47239_c4_g9	574	264	455	405	195	278
TRINITY_DN5150_c0_g1	4	12	8	0	6	10
TRINITY_DN51614_c0_g1	2096	2137	2048	1487	857	2425
TRINITY_DN33589_c1_g1	72	54	70	72	53	42
TRINITY_DN47239_c4_g5	348	203	263	165	74	248
TRINITY_DN50571_c0_g2	4	17	6	4	10	6
TRINITY_DN50571_c0_g1	2172	2066	1890	1531	1050	1921
TRINITY_DN46309_c2_g2	19	0	12	12	4	2
TRINITY_DN51445_c4_g1	696	358	979	645	289	501
TRINITY_DN39311_c2_g2	68	61	68	102	116	85
TRINITY_DN47563_c0_g2	0	4	6	2	0	8
TRINITY_DN47563_c0_g1	0	18	10	0	0	14
TRINITY_DN39470_c6_g1	14816	11917	12207	9765	7638	12702
TRINITY_DN111566_c0_g1	0	0	6	2	0	2
TRINITY_DN43636_c0_g1	3913	3344	2684	2039	2293	2429
TRINITY_DN37989_c2_g9	927	786	737	667	304	926
TRINITY_DN48183_c0_g1	92	371	189	206	244	312
TRINITY_DN50604_c5_g1	7668	15684	14050	13575	3369	12683
TRINITY_DN54587_c3_g1	11484	8820	7612	5605	4255	9196
TRINITY_DN54052_c2_g1	3923	3054	3401	2298	1822	3855
TRINITY_DN42192_c1_g1	422	144	130	172	173	252
TRINITY_DN77236_c0_g1	0	0	0	0	0	0
TRINITY_DN47453_c3_g5	50	101	82	114	210	90
TRINITY_DN49409_c1_g1	352	272	532	310	309	239
TRINITY_DN41395_c7_g1	2	20	10	14	4	44
TRINITY_DN30901_c0_g1	1238	1230	1710	965	456	1535
TRINITY_DN42552_c4_g1	5127	2354	2413	2408	3900	2230
TRINITY_DN27248_c0_g1	4	28	4	0	0	4
TRINITY_DN90098_c0_g1	0	0	8	0	0	0
TRINITY_DN14651_c0_g1	0	0	0	0	0	4
TRINITY_DN48983_c0_g1	1198	849	841	500	531	743
TRINITY_DN48360_c2_g1	1186	889	571	3811	862	801
TRINITY_DN665_c0_g1	10	0	0	8	0	0
TRINITY_DN73965_c0_g1	0	4	6	0	0	0
TRINITY_DN42176_c1_g2	442	295	501	473	100	228
TRINITY_DN36013_c2_g3	1221	39	42	1081	373	63
TRINITY_DN347_c0_g1	12	0	8	10	8	2
TRINITY_DN42777_c1_g7	8	18	6	14	10	28
TRINITY_DN42777_c1_g4	491	369	364	545	132	311
TRINITY_DN45646_c0_g1	47	24	24	72	25	32
TRINITY_DN49549_c0_g2	228	263	302	156	136	409
TRINITY_DN51441_c2_g6	252	1150	940	437	103	1291
TRINITY_DN51441_c2_g4	1568	342	388	263	924	447
TRINITY_DN51441_c2_g5	0	209	82	57	4	140
TRINITY_DN40363_c2_g2	64	64	34	114	12	86
TRINITY_DN40363_c2_g1	1431	1386	1250	1081	490	1122
TRINITY_DN49614_c1_g1	0	8	4	2	4	8
TRINITY_DN39147_c2_g1	1935	1642	1053	982	938	1364
TRINITY_DN37595_c1_g1	598	483	278	151	93	395
TRINITY_DN38582_c1_g1	6169	7462	5648	6132	961	7016
TRINITY_DN32531_c0_g1	78	64	186	90	44	84
TRINITY_DN37595_c1_g2	4894	2811	7562	2536	601	4889
TRINITY_DN48016_c1_g1	4042	1664	3784	1865	607	2544
TRINITY_DN49335_c0_g3	99	74	82	84	100	80
TRINITY_DN45494_c0_g1	312	636	476	286	130	368
TRINITY_DN47895_c1_g2	2518	1456	1310	1531	1709	2061
TRINITY_DN48823_c4_g1	868	487	427	693	580	425
TRINITY_DN50197_c1_g1	793	608	624	449	302	468
TRINITY_DN50197_c1_g2	3651	3144	3082	2287	1766	2536
TRINITY_DN34870_c8_g2	0	0	0	0	0	0
TRINITY_DN39402_c2_g5	2147	856	824	1372	811	688
TRINITY_DN41694_c0_g1	2	4	0	0	0	3
TRINITY_DN24457_c1_g1	2	8	0	4	2	0
TRINITY_DN43901_c4_g1	880	791	734	554	763	866
TRINITY_DN54734_c0_g1	457	1423	1400	824	266	1299
TRINITY_DN34993_c8_g2	4	22	4	5	0	18
TRINITY_DN54076_c2_g3	32	20	22	32	24	36
TRINITY_DN54076_c2_g1	5510	6184	5609	4625	2896	5538
TRINITY_DN32870_c2_g1	24	18	4	16	0	12
TRINITY_DN50325_c0_g1	2674	3251	2628	1920	1526	2046
TRINITY_DN47966_c0_g4	0	6	10	14	21	4
TRINITY_DN49839_c3_g4	24	40	32	44	48	61
TRINITY_DN48777_c1_g3	3714	2034	1897	2249	1642	2367
TRINITY_DN49839_c3_g1	1851	1472	942	1037	467	1348
TRINITY_DN44004_c0_g1	1264	984	1045	638	463	1092
TRINITY_DN41735_c4_g1	1681	1379	1121	937	1154	1321
TRINITY_DN52132_c0_g1	41	2	4	2	4	0
TRINITY_DN7714_c0_g1	2	0	0	0	0	3
TRINITY_DN54293_c3_g1	711	229	164	223	806	154
TRINITY_DN54293_c3_g5	0	37	9	0	28	19
TRINITY_DN104995_c0_g1	34	36	0	2	8	8
TRINITY_DN65718_c0_g1	0	10	2	0	4	8
TRINITY_DN26811_c0_g1	10	137	20	48	0	94
TRINITY_DN50533_c1_g1	1973	2285	1621	919	645	2359
TRINITY_DN57353_c0_g1	0	0	6	0	0	4
TRINITY_DN51502_c1_g1	4493	2766	2578	2305	2416	3515
TRINITY_DN37188_c1_g1	112	169	144	64	150	178
TRINITY_DN43570_c4_g1	73	221	116	228	220	232
TRINITY_DN52522_c8_g1	8805	8952	9538	7966	4870	9833
TRINITY_DN25593_c0_g1	22	2	0	2	10	0
TRINITY_DN46619_c0_g1	1373	1219	1305	1444	1080	1521
TRINITY_DN44955_c3_g1	272	397	262	643	352	438
TRINITY_DN31651_c0_g1	20	66	28	20	16	43
TRINITY_DN49912_c2_g2	96	155	78	196	60	132
TRINITY_DN38915_c3_g1	330	310	78	74	114	251
TRINITY_DN40080_c1_g1	86	94	76	80	150	98
TRINITY_DN54996_c10_g4	79	269	194	129	39	355
TRINITY_DN39674_c1_g2	665	412	580	319	386	562
TRINITY_DN39674_c1_g1	142	130	156	94	78	164
TRINITY_DN54996_c10_g1	727	1391	987	941	293	1426
TRINITY_DN37993_c4_g1	6	0	4	789	4	9
TRINITY_DN37993_c4_g2	12	14	8	86	12	14
TRINITY_DN47832_c1_g2	1523	1146	1306	1218	664	1493
TRINITY_DN45473_c3_g3	16	2510	1058	16	52	847
TRINITY_DN37870_c0_g1	222	276	150	194	286	304
TRINITY_DN67606_c0_g1	4	0	0	2	0	0
TRINITY_DN68998_c0_g1	0	0	0	0	0	0
TRINITY_DN36016_c1_g3	4938	4248	4051	4276	2520	4282
TRINITY_DN54524_c1_g2	1661	1446	1878	1676	598	1798
TRINITY_DN91679_c0_g1	4	0	0	0	4	0
TRINITY_DN50667_c0_g2	10740	7936	8324	10805	4061	7946
TRINITY_DN54523_c1_g1	65	46	30	75	36	32
TRINITY_DN38658_c0_g1	747	310	212	437	308	248
TRINITY_DN48440_c1_g1	1326	607	429	411	716	684
TRINITY_DN49119_c5_g2	185	16	10	56	45	13
TRINITY_DN38658_c0_g2	2624	959	774	778	1012	972
TRINITY_DN48440_c1_g4	30	8	13	4	16	6
TRINITY_DN43088_c0_g3	2	68	24	101	21	29
TRINITY_DN14970_c0_g1	16	30	19	4	2	6
TRINITY_DN38902_c6_g1	3012	2359	2216	1657	888	2550
TRINITY_DN84_c0_g1	4	1885	1595	24	0	1429
TRINITY_DN53960_c2_g3	0	0	4	0	0	4
TRINITY_DN53960_c2_g1	4656	3763	3627	2931	2683	3635
TRINITY_DN37946_c1_g1	84	58	53	46	70	124
TRINITY_DN45119_c1_g1	263	161	304	95	85	172
TRINITY_DN37898_c0_g2	28	0	0	46	62	0
TRINITY_DN34802_c3_g6	0	0	0	0	0	0
TRINITY_DN20393_c0_g1	3	7	7	16	9	17
TRINITY_DN34560_c4_g13	33	4	6	52	0	4
TRINITY_DN50762_c2_g1	693	399	382	193	418	534
TRINITY_DN85432_c0_g1	0	2	4	0	6	0
TRINITY_DN38225_c1_g1	943	493	551	615	455	541
TRINITY_DN45118_c1_g1	366	298	309	133	252	318
TRINITY_DN39104_c4_g3	51	57	33	56	63	49
TRINITY_DN39104_c4_g1	6	2	0	0	24	4
TRINITY_DN36721_c0_g5	396	492	724	714	813	372
TRINITY_DN44832_c0_g2	1144	2224	1250	624	578	2159
TRINITY_DN80347_c0_g1	0	1141	619	178	0	442
TRINITY_DN100364_c0_g1	0	0	0	0	0	2
TRINITY_DN49886_c3_g1	1160	1006	1176	923	708	1062
TRINITY_DN50047_c1_g8	1	6	14	0	0	0
TRINITY_DN50047_c1_g9	21	60	59	14	22	70
TRINITY_DN50047_c1_g7	107	253	187	47	33	215
TRINITY_DN50047_c1_g5	267	437	336	354	228	425
TRINITY_DN50047_c1_g2	1	6	14	0	0	2
TRINITY_DN52634_c0_g4	86	70	28	32	72	54
TRINITY_DN48748_c3_g1	8727	8076	10691	9883	3601	11502
TRINITY_DN35207_c0_g7	40	14	0	16	14	0
TRINITY_DN48748_c3_g3	25	6	23	23	21	29
TRINITY_DN49236_c2_g1	414	662	593	285	183	488
TRINITY_DN23120_c0_g1	0	0	0	0	0	4
TRINITY_DN53924_c1_g4	19045	12325	20713	12936	2520	12708
TRINITY_DN53502_c3_g1	444	380	232	296	210	266
TRINITY_DN44276_c5_g4	10	2	0	2	0	0
TRINITY_DN91037_c0_g1	6	6	4	0	8	16
TRINITY_DN53502_c3_g2	47	84	65	4	109	105
TRINITY_DN50327_c2_g2	122	134	160	249	164	194
TRINITY_DN37276_c0_g1	282	210	125	139	99	148
TRINITY_DN49776_c0_g1	10372	10049	13008	6949	3177	11382
TRINITY_DN50423_c1_g1	4742	3185	3357	3282	2465	2931
TRINITY_DN49659_c3_g2	1910	1290	1514	1075	905	1720
TRINITY_DN51087_c1_g1	0	0	0	0	0	0
TRINITY_DN52560_c8_g1	2	0	0	0	0	0
TRINITY_DN48073_c1_g4	7047	660	614	1976	6743	695
TRINITY_DN48073_c1_g2	1693	1130	1279	1436	696	1066
TRINITY_DN48073_c1_g3	562	36	52	201	494	25
TRINITY_DN46167_c2_g1	3831	3145	3120	2728	1496	3539
TRINITY_DN48073_c1_g1	52	88	56	224	32	28
TRINITY_DN40216_c5_g1	84	112	46	14	46	84
TRINITY_DN41945_c3_g1	261	212	207	242	278	234
TRINITY_DN41945_c3_g3	24	45	17	18	90	45
TRINITY_DN47037_c1_g2	3999	2988	3061	2588	1856	3249
TRINITY_DN66463_c0_g1	0	0	2	0	0	0
TRINITY_DN54693_c3_g2	1441	1484	1336	942	1117	1934
TRINITY_DN44043_c2_g2	182	130	142	294	34	155
TRINITY_DN40751_c0_g1	9091	6655	7543	5382	2062	7335
TRINITY_DN22026_c0_g1	0	0	0	10	0	0
TRINITY_DN17107_c0_g1	0	0	2	0	0	6
TRINITY_DN53627_c3_g1	9245	4033	3734	3272	6741	4403
TRINITY_DN53627_c3_g3	12	8	2	24	44	10
TRINITY_DN33898_c0_g1	1543	825	226	214	272	318
TRINITY_DN97450_c0_g1	8	4	8	0	2	8
TRINITY_DN55583_c0_g1	40	42	38	179	70	18
TRINITY_DN52989_c2_g3	7994	8916	9094	8050	5552	11172
TRINITY_DN46920_c0_g1	5053	5415	6517	4936	2298	7720
TRINITY_DN52989_c2_g5	10	10	2	4	8	16
TRINITY_DN38231_c4_g1	128	124	76	72	127	112
TRINITY_DN45326_c0_g3	270	204	107	75	62	161
TRINITY_DN45326_c0_g2	508	532	435	264	106	386
TRINITY_DN54278_c3_g1	2215	3375	2530	1228	1441	4118
TRINITY_DN38203_c2_g1	216	154	74	34	61	145
TRINITY_DN40392_c1_g1	948	555	448	447	547	669
TRINITY_DN40831_c0_g1	624	325	259	480	393	220
TRINITY_DN53687_c5_g1	5044	3895	3650	2264	2547	4490
TRINITY_DN37343_c7_g1	65	157	145	90	62	214
TRINITY_DN44709_c1_g3	4802	4773	4929	4811	1730	5585
TRINITY_DN44709_c1_g1	10	20	4	14	6	10
TRINITY_DN41490_c3_g2	1901	837	748	1148	1475	821
TRINITY_DN78013_c0_g1	0	0	0	0	0	0
TRINITY_DN41490_c3_g1	4	0	0	197	4	0
TRINITY_DN51323_c2_g5	131	373	197	183	515	393
TRINITY_DN51323_c2_g1	76	338	194	229	175	306
TRINITY_DN51323_c2_g3	5	13	9	26	18	8
TRINITY_DN37588_c0_g1	346	667	523	316	696	731
TRINITY_DN40288_c4_g1	18	14	0	18	0	6
TRINITY_DN51516_c5_g2	22	0	0	4	37	0
TRINITY_DN37449_c2_g1	1570	1507	1248	813	1143	1569
TRINITY_DN46196_c2_g1	732	1321	1378	993	326	1671
TRINITY_DN55994_c0_g1	10	16	0	2	0	0
TRINITY_DN65122_c0_g1	0	4	6	4	4	2
TRINITY_DN41314_c0_g1	1037	1342	1373	1140	481	1281
TRINITY_DN48891_c0_g1	3012	3129	2647	2086	1376	2974
TRINITY_DN49633_c1_g1	1742	2100	1818	1961	1283	1842
TRINITY_DN22289_c0_g1	0	0	0	2	6	0
TRINITY_DN46939_c3_g1	294	364	210	260	499	418
TRINITY_DN47643_c1_g1	1174	1030	1410	1247	502	1435
TRINITY_DN41236_c2_g1	0	0	0	0	2	0
TRINITY_DN51541_c0_g6	2	0	0	0	0	0
TRINITY_DN51541_c0_g1	2538	1560	1261	1117	507	1303
TRINITY_DN34506_c0_g1	50	362	145	112	40	120
TRINITY_DN53611_c3_g1	3068	2931	3059	2789	1506	2954
TRINITY_DN54775_c4_g1	1123	108	130	50	1245	132
TRINITY_DN34290_c0_g1	365	217	204	68	191	215
TRINITY_DN54775_c4_g2	2	0	6	4	2	12
TRINITY_DN47718_c2_g1	239	522	344	481	524	597
TRINITY_DN65500_c0_g1	2	2	0	2	0	18
TRINITY_DN33954_c7_g1	0	5	0	0	0	0
TRINITY_DN53291_c4_g3	4	24	16	2	0	6
TRINITY_DN53291_c4_g2	12	82	46	34	48	94
TRINITY_DN44407_c1_g1	63	76	38	18	12	53
TRINITY_DN53965_c2_g2	30	44	34	16	32	38
TRINITY_DN53965_c2_g1	215	97	132	94	28	75
TRINITY_DN38171_c0_g1	363	268	385	642	12	447
TRINITY_DN50373_c3_g1	1939	1776	1953	1804	922	2316
TRINITY_DN47099_c0_g1	212	192	322	257	214	488
TRINITY_DN47099_c0_g2	1670	924	1343	1065	477	1239
TRINITY_DN47578_c2_g2	118	124	106	80	103	152
TRINITY_DN33582_c0_g1	256	402	404	250	138	357
TRINITY_DN44428_c0_g2	1090	727	1085	762	1369	465
TRINITY_DN48945_c1_g1	6528	4599	6774	3405	2545	7705
TRINITY_DN52498_c1_g3	2435	2064	1735	3062	1298	1964
TRINITY_DN52498_c1_g4	365	217	165	325	91	102
TRINITY_DN43859_c3_g3	146	302	250	175	216	208
TRINITY_DN42979_c4_g1	1164	923	1086	1010	541	1086
TRINITY_DN49964_c1_g9	185	447	401	189	146	558
TRINITY_DN40011_c2_g2	1922	997	1105	1658	1043	962
TRINITY_DN35046_c1_g2	40	22	2	37	14	12
TRINITY_DN35975_c5_g1	650	146	134	68	156	146
TRINITY_DN35046_c1_g1	2668	2984	2381	1681	1118	3198
TRINITY_DN40296_c3_g1	65	18	21	14	16	57
TRINITY_DN37312_c4_g1	0	245	145	91	4	306
TRINITY_DN40296_c3_g2	27	10	11	10	23	8
TRINITY_DN43294_c2_g1	16164	12551	13391	9096	4925	12375
TRINITY_DN42750_c2_g1	64	58	22	12	6	78
TRINITY_DN51014_c0_g1	13863	10717	12796	18145	5041	11857
TRINITY_DN49709_c0_g3	1816	1758	1536	1323	725	1667
TRINITY_DN49709_c0_g1	1143	957	570	411	499	905
TRINITY_DN40975_c0_g1	1796	810	794	575	637	945
TRINITY_DN72331_c0_g1	445	8792	885	431	537	586
TRINITY_DN41469_c2_g7	60	208	82	10	24	155
TRINITY_DN53749_c1_g5	116	102	86	62	120	36
TRINITY_DN46719_c0_g1	4427	3774	4866	4384	2061	4229
TRINITY_DN40895_c2_g2	217	48	44	31	104	42
TRINITY_DN50120_c0_g1	14	24	30	8	4	4
TRINITY_DN37983_c4_g1	1023	373	186	356	876	295
TRINITY_DN40902_c0_g1	1796	1641	1506	1198	703	1418
TRINITY_DN40902_c0_g2	732	687	472	552	341	494
TRINITY_DN27143_c0_g3	2	0	0	0	0	4
TRINITY_DN48058_c0_g1	2221	1903	2133	1535	482	1786
TRINITY_DN47843_c3_g2	1137	928	925	637	391	964
TRINITY_DN50799_c6_g2	2402	1539	1660	1661	373	1097
TRINITY_DN53832_c1_g1	114	92	37	57	25	73
TRINITY_DN48377_c0_g1	1423	1653	1279	698	837	1515
TRINITY_DN34250_c1_g1	108	75	53	107	66	97
TRINITY_DN46569_c0_g1	110	150	104	134	232	135
TRINITY_DN45155_c0_g1	0	12	4	672	25	8
TRINITY_DN42788_c0_g1	5478	5143	5524	4555	2642	5001
TRINITY_DN43833_c2_g10	5750	3771	8029	5505	2327	6084
TRINITY_DN41480_c0_g1	3975	4016	4781	3893	2791	4322
TRINITY_DN38791_c2_g12	2	6	0	6	2	4
TRINITY_DN38791_c2_g11	26	0	0	76	14	0
TRINITY_DN38271_c0_g1	116	114	86	92	24	78
TRINITY_DN43578_c1_g3	704	692	699	798	139	711
TRINITY_DN40882_c3_g1	637	516	604	380	262	596
TRINITY_DN43578_c1_g2	3275	2813	1476	988	1186	3233
TRINITY_DN44329_c1_g1	78	65	71	119	180	47
TRINITY_DN47814_c3_g2	5427	9279	4677	2756	2181	3427
TRINITY_DN88918_c0_g1	8	0	0	0	0	0
TRINITY_DN51893_c0_g1	1734	1263	754	1413	335	989
TRINITY_DN42695_c2_g3	322	334	184	308	124	148
TRINITY_DN42572_c0_g2	582	404	542	384	218	578
TRINITY_DN71833_c0_g1	6	0	0	4	8	4
TRINITY_DN38371_c1_g1	142	234	168	236	282	290
TRINITY_DN46586_c0_g1	1788	1592	931	227	1015	1508
TRINITY_DN45067_c4_g3	3	0	5	2	0	2
TRINITY_DN39401_c0_g1	861	294	548	568	170	513
TRINITY_DN46404_c0_g1	310	490	429	155	51	339
TRINITY_DN44825_c1_g3	1439	1855	1901	1612	852	2238
TRINITY_DN112301_c0_g1	20	40	4	6	0	4
TRINITY_DN54631_c2_g2	1791	1365	557	727	606	656
TRINITY_DN54631_c2_g3	1959	760	417	595	483	313
TRINITY_DN50135_c6_g3	698	750	470	380	226	609
TRINITY_DN54123_c0_g3	50	101	38	18	21	54
TRINITY_DN54123_c0_g1	10	57	10	38	5	67
TRINITY_DN45928_c0_g1	314	272	208	521	387	259
TRINITY_DN106075_c0_g1	4	4	4	0	0	0
TRINITY_DN10076_c0_g1	44	8	8	6	8	32
TRINITY_DN34634_c0_g3	1369	2174	1987	2335	427	2829
TRINITY_DN17993_c0_g1	0	12	14	8	0	4
TRINITY_DN34321_c2_g2	143	98	46	34	32	68
TRINITY_DN30896_c0_g1	26	20	4	36	12	32
TRINITY_DN49857_c4_g11	0	2	4	12	0	10
TRINITY_DN49849_c1_g2	133	138	97	132	267	213
TRINITY_DN49849_c1_g1	2	14	8	67	12	18
TRINITY_DN47963_c1_g1	972	951	456	921	574	567
TRINITY_DN45091_c4_g1	660	381	400	353	264	546
TRINITY_DN34016_c3_g1	54	44	26	18	6	48
TRINITY_DN34016_c3_g2	69	38	37	890	40	12
TRINITY_DN34016_c3_g3	4	16	4	16	4	0
TRINITY_DN34016_c3_g4	22	165	104	121	16	74
TRINITY_DN34016_c3_g5	5	9	4	6	8	12
TRINITY_DN53667_c2_g1	6752	5986	4597	3438	2065	5515
TRINITY_DN35810_c2_g2	411	406	212	62	189	254
TRINITY_DN71418_c0_g1	51	54	18	64	8	35
TRINITY_DN107926_c0_g1	2	2	0	4	4	0
TRINITY_DN54466_c3_g1	2045	3149	2667	2353	1325	2614
TRINITY_DN50006_c1_g2	2355	1988	2332	1641	443	2529
TRINITY_DN35810_c2_g4	1087	461	191	123	771	342
TRINITY_DN35810_c2_g5	658	827	368	178	459	366
TRINITY_DN45249_c5_g1	201	212	141	141	119	217
TRINITY_DN46548_c5_g1	0	12	10	18	16	29
TRINITY_DN54972_c0_g1	2759	3827	2643	2715	1885	3296
TRINITY_DN54972_c0_g2	10	559	244	256	8	522
TRINITY_DN54972_c0_g3	4	4	2	0	4	0
TRINITY_DN54972_c0_g5	10	0	0	4	12	2
TRINITY_DN40470_c6_g1	484	1154	1094	834	464	1286
TRINITY_DN16403_c0_g1	0	0	0	0	0	0
TRINITY_DN34231_c0_g1	3701	2978	1980	1127	3213	2749
TRINITY_DN51859_c4_g1	709	125	112	237	534	148
TRINITY_DN50506_c3_g2	2	14	16	16	4	26
TRINITY_DN32401_c0_g1	199	245	216	75	78	140
TRINITY_DN22728_c0_g1	0	0	0	0	0	0
TRINITY_DN52439_c0_g6	300	318	366	294	565	200
TRINITY_DN41242_c3_g1	48	14	44	150	4	4
TRINITY_DN41242_c3_g3	28	22	48	374	10	34
TRINITY_DN64380_c0_g1	4	0	0	10	4	0
TRINITY_DN41242_c3_g4	6	0	0	0	0	0
TRINITY_DN48413_c1_g1	1712	1263	1006	965	367	1315
TRINITY_DN48413_c1_g2	164	147	81	155	76	138
TRINITY_DN48413_c1_g3	5575	5949	5879	4947	2652	6903
TRINITY_DN37855_c2_g1	82	44	39	69	50	38
TRINITY_DN32680_c0_g1	102	18	4	169	196	30
TRINITY_DN12619_c0_g1	63	18	14	6	32	8
TRINITY_DN37908_c0_g4	0	6	0	3	4	0
TRINITY_DN38041_c2_g3	625	734	719	306	150	654
TRINITY_DN37908_c0_g1	1909	715	661	659	799	831
TRINITY_DN38041_c2_g1	3228	2703	2125	2151	2447	2359
TRINITY_DN37908_c0_g3	86	56	16	21	4	15
TRINITY_DN45038_c1_g1	3126	3013	2981	2878	1678	3628
TRINITY_DN53211_c3_g2	2565	2190	1349	1206	755	1668
TRINITY_DN53211_c3_g1	11867	2403	3518	3553	3434	3107
TRINITY_DN46440_c2_g2	4251	3550	3944	4639	1743	3780
TRINITY_DN112356_c0_g1	8	8	2	6	0	0
TRINITY_DN42384_c0_g2	56067	56926	67810	82638	34202	52022
TRINITY_DN54308_c0_g4	0	2	2	2	0	0
TRINITY_DN45444_c2_g2	1115	24	38	633	80	51
TRINITY_DN40684_c1_g1	3603	3120	2606	2006	1402	3532
TRINITY_DN42760_c1_g2	530	1358	674	294	252	1220
TRINITY_DN37246_c9_g1	0	0	0	0	0	0
TRINITY_DN32032_c0_g1	133	116	72	50	64	52
TRINITY_DN39606_c3_g1	1976	1589	917	1046	546	1248
TRINITY_DN41149_c0_g1	1350	1389	1447	83	993	1299
TRINITY_DN71809_c0_g1	6	0	2	14	4	0
TRINITY_DN34221_c2_g3	6	23	3	4	13	6
TRINITY_DN54438_c2_g1	8938	7610	8012	6913	3880	8448
TRINITY_DN39963_c1_g9	124	178	190	170	115	26
TRINITY_DN53498_c1_g1	818	712	541	495	265	871
TRINITY_DN45404_c4_g1	6257	6145	8394	6846	3364	8106
TRINITY_DN47430_c1_g1	4157	4154	4658	3578	3281	4828
TRINITY_DN44955_c2_g1	30	8	10	30	10	11
TRINITY_DN52381_c8_g1	0	0	2	0	0	0
TRINITY_DN42494_c1_g10	66	48	76	42	36	74
TRINITY_DN45407_c4_g2	524	498	394	220	351	431
TRINITY_DN54577_c3_g6	63	116	87	228	85	136
TRINITY_DN84925_c0_g1	0	0	0	18	0	0
TRINITY_DN46775_c7_g1	25	6	6	16	8	12
TRINITY_DN34286_c1_g1	86	156	66	178	144	156
TRINITY_DN43050_c6_g1	148	166	152	136	72	178
TRINITY_DN40020_c1_g6	8	54	28	34	22	114
TRINITY_DN45407_c4_g5	6	14	10	0	16	8
TRINITY_DN54185_c2_g1	4378	4284	4044	4306	2635	4752
TRINITY_DN54185_c2_g2	256	148	84	104	38	184
TRINITY_DN54185_c2_g4	2250	1824	1089	1261	479	1521
TRINITY_DN47270_c1_g2	461	657	766	225	144	518
TRINITY_DN52319_c1_g3	413	793	469	217	253	569
TRINITY_DN52319_c1_g1	3152	3658	4022	3832	1562	3612
TRINITY_DN52319_c1_g4	54	189	114	79	24	86
TRINITY_DN47270_c1_g5	1738	668	714	826	286	770
TRINITY_DN37151_c4_g1	485	264	312	248	234	346
TRINITY_DN40039_c1_g2	854	779	641	590	585	634
TRINITY_DN54067_c1_g1	7988	7257	7009	4083	2535	7506
TRINITY_DN42523_c2_g4	22	4	0	6	6	16
TRINITY_DN54066_c3_g3	624	22	24	215	158	26
TRINITY_DN50729_c1_g1	170	32	26	152	76	44
TRINITY_DN46867_c7_g1	481	572	388	402	519	773
TRINITY_DN41377_c4_g8	26	36	14	82	58	64
TRINITY_DN34182_c3_g2	706	918	969	626	320	1016
TRINITY_DN50729_c1_g8	104	98	94	222	252	96
TRINITY_DN34182_c3_g1	52	134	328	132	44	220
TRINITY_DN46351_c2_g1	12156	11383	11227	11013	3454	12749
TRINITY_DN49691_c3_g1	84	1529	705	245	130	983
TRINITY_DN16862_c0_g2	0	0	12	0	4	2
TRINITY_DN99106_c0_g1	0	4	2	0	0	2
TRINITY_DN53896_c1_g1	855	616	404	434	130	574
TRINITY_DN32047_c0_g1	937	142	88	48	653	204
TRINITY_DN53896_c1_g3	0	2	2	10	0	2
TRINITY_DN53896_c1_g2	11808	8773	9582	7478	5711	9817
TRINITY_DN53896_c1_g4	8	8	4	6	8	16
TRINITY_DN36067_c1_g1	9	13	4	23	65	20
TRINITY_DN30124_c0_g1	20	15	14	14	16	21
TRINITY_DN48120_c2_g1	140	187	148	95	113	240
TRINITY_DN78557_c0_g1	10	0	6	0	0	0
TRINITY_DN40268_c4_g4	153	251	181	84	170	248
TRINITY_DN36546_c0_g1	76	8	0	195	38	14
TRINITY_DN38135_c0_g1	135	363	488	30	268	226
TRINITY_DN37559_c1_g1	218	491	405	458	136	672
TRINITY_DN35654_c3_g3	547	667	369	390	654	570
TRINITY_DN35654_c3_g1	152	406	311	179	299	412
TRINITY_DN2888_c0_g1	4	0	0	0	0	0
TRINITY_DN52706_c3_g1	44755	65145	39427	9703	29294	44979
TRINITY_DN43757_c1_g5	4	2	0	0	2	0
TRINITY_DN49528_c1_g6	98	60	62	38	90	60
TRINITY_DN43545_c3_g1	2997	2493	2023	2228	1295	2529
TRINITY_DN35795_c0_g1	985	658	612	596	362	608
TRINITY_DN40671_c2_g1	15388	12952	16859	13549	5970	17852
TRINITY_DN54329_c2_g1	18	12	12	2	8	14
TRINITY_DN26414_c1_g1	19	0	0	21	9	20
TRINITY_DN39303_c2_g1	11777	9847	10558	14378	1472	10656
TRINITY_DN52086_c0_g1	2061	2238	2160	1958	831	2090
TRINITY_DN42917_c1_g1	0	127	144	42	4	104
TRINITY_DN49699_c3_g1	32	45	28	22	20	28
TRINITY_DN45859_c0_g2	408	306	148	92	196	255
TRINITY_DN40827_c0_g3	0	0	0	0	0	0
TRINITY_DN42016_c3_g1	869	833	968	737	490	1261
TRINITY_DN49683_c3_g2	1012	8256	3116	3331	879	2429
TRINITY_DN54310_c2_g1	1670	843	623	700	367	780
TRINITY_DN49683_c3_g6	633	432	475	465	367	406
TRINITY_DN49683_c3_g7	35	27	18	38	16	17
TRINITY_DN34798_c1_g2	24	2	0	4	2	2
TRINITY_DN34798_c1_g1	1186	1528	1687	1124	628	1447
TRINITY_DN48517_c1_g1	3130	1396	1140	1275	1258	721
TRINITY_DN45842_c0_g2	743	1180	810	341	380	552
TRINITY_DN48517_c1_g2	603	549	513	449	281	484
TRINITY_DN36014_c6_g6	0	0	0	0	0	0
TRINITY_DN50566_c0_g3	6	12	0	8	2	8
TRINITY_DN50566_c0_g1	151	175	94	91	164	100
TRINITY_DN45179_c0_g1	1344	1048	1032	616	816	1033
TRINITY_DN42833_c0_g2	1422	1217	1162	1083	517	1307
TRINITY_DN37382_c1_g3	0	0	0	0	0	0
TRINITY_DN37382_c1_g2	1227	2218	1632	1004	504	1170
TRINITY_DN37382_c1_g1	378	385	304	387	185	295
TRINITY_DN39850_c0_g2	1153	339	293	342	961	413
TRINITY_DN104522_c0_g1	0	0	0	2	0	2
TRINITY_DN43484_c2_g1	1535	2382	1029	592	703	1777
TRINITY_DN44456_c2_g2	0	4	26	146	38	49
TRINITY_DN8554_c0_g1	8	0	2	8	0	4
TRINITY_DN43092_c2_g1	0	0	0	2	0	0
TRINITY_DN54637_c5_g1	1813	1508	1342	1347	593	1621
TRINITY_DN54637_c5_g3	5026	4253	4131	2895	2365	4292
TRINITY_DN54637_c5_g2	5659	5062	3173	2279	2313	4355
TRINITY_DN53438_c1_g1	716	865	549	243	554	690
TRINITY_DN43778_c0_g1	1054	3256	2912	1381	665	3661
TRINITY_DN53438_c1_g3	53	134	62	120	72	168
TRINITY_DN53438_c1_g2	1615	1496	1344	1458	522	1042
TRINITY_DN53438_c1_g4	0	20	28	8	24	16
TRINITY_DN95815_c0_g1	22	135	66	4	14	42
TRINITY_DN49635_c1_g1	100	51	19	9	84	75
TRINITY_DN54789_c5_g1	437	330	243	154	325	387
TRINITY_DN46731_c0_g1	15	0	2	0	6	8
TRINITY_DN53228_c1_g1	0	88	30	42	0	95
TRINITY_DN49264_c0_g1	0	6	0	9	8	0
TRINITY_DN49264_c0_g2	1932	1897	1785	1641	997	1926
TRINITY_DN49264_c0_g3	1447	1279	1227	1177	680	1299
TRINITY_DN75939_c0_g1	0	0	0	0	0	0
TRINITY_DN37992_c0_g1	1604	836	782	1068	936	838
TRINITY_DN46557_c1_g2	1427	659	774	429	267	740
TRINITY_DN30865_c0_g1	1038	806	862	845	136	777
TRINITY_DN44915_c7_g2	1116	903	1244	869	510	1114
TRINITY_DN25427_c0_g1	12	18	16	8	16	4
TRINITY_DN53543_c2_g1	14865	21190	17365	13461	7967	15948
TRINITY_DN111469_c0_g1	0	12	2	2	2	6
TRINITY_DN41113_c4_g1	36	112	88	110	164	169
TRINITY_DN53543_c2_g6	16	102	49	135	164	124
TRINITY_DN53543_c2_g5	2735	2566	1806	1362	538	2179
TRINITY_DN39087_c3_g2	3720	3630	2381	2469	617	3484
TRINITY_DN49439_c1_g3	863	1117	653	568	733	1194
TRINITY_DN49322_c0_g3	335	155	121	139	200	135
TRINITY_DN40806_c0_g3	1513	1579	1318	1045	397	1122
TRINITY_DN48510_c1_g1	2677	2513	1795	1489	1047	2586
TRINITY_DN39286_c4_g1	3363	744	777	1729	2185	774
TRINITY_DN39529_c0_g1	857	740	653	147	277	573
TRINITY_DN2209_c1_g1	14	4	0	2	0	2
TRINITY_DN49032_c1_g4	5531	2866	1526	1020	2860	2496
TRINITY_DN6669_c0_g1	9	0	4	8	6	4
TRINITY_DN47189_c0_g3	26	18	26	24	26	26
TRINITY_DN52200_c0_g1	1470	1645	1567	1230	800	1630
TRINITY_DN35247_c1_g1	122	76	113	103	46	80
TRINITY_DN21657_c0_g1	10	0	6	10	2	22
TRINITY_DN35247_c1_g3	68	134	82	133	24	134
TRINITY_DN49707_c1_g2	4398	5160	3316	2443	3065	4372
TRINITY_DN49707_c1_g1	176	143	141	120	141	96
TRINITY_DN43391_c1_g1	1125	1229	1355	892	365	1183
TRINITY_DN44284_c3_g1	30	226	101	46	34	246
TRINITY_DN39553_c0_g5	170	805	405	39	72	560
TRINITY_DN33871_c0_g1	66	100	92	148	89	128
TRINITY_DN41745_c3_g1	192	8	20	57	72	8
TRINITY_DN29471_c0_g1	44	138	12	34	6	8
TRINITY_DN54902_c1_g1	8	50	23	40	34	105
TRINITY_DN39290_c0_g2	3135	2834	3103	3583	1419	2817
TRINITY_DN52097_c1_g1	3736	1816	1685	1391	2835	2687
TRINITY_DN54557_c3_g1	3862	3396	2554	2663	1813	3961
TRINITY_DN50648_c0_g1	12186	16493	12535	8208	5644	16472
TRINITY_DN45227_c1_g2	54	56	44	76	21	100
TRINITY_DN45614_c2_g1	56	44	20	46	76	66
TRINITY_DN45702_c0_g1	1388	642	950	1290	542	775
TRINITY_DN56912_c0_g1	0	0	0	0	0	0
TRINITY_DN55901_c0_g1	10	0	30	4	0	8
TRINITY_DN42650_c1_g1	41	4	5	25	25	21
TRINITY_DN4368_c0_g1	0	0	0	0	0	0
TRINITY_DN27830_c0_g1	30	0	8	4	6	10
TRINITY_DN39153_c2_g1	1684	1571	1343	1363	1300	1718
TRINITY_DN39153_c2_g2	2	18	22	26	36	24
TRINITY_DN46689_c4_g1	18138	19929	8726	7106	15548	15582
TRINITY_DN46837_c6_g1	99	148	197	105	54	102
TRINITY_DN49053_c2_g1	348	1347	808	618	1007	1530
TRINITY_DN52251_c0_g1	1036	1135	1158	884	553	1090
TRINITY_DN45658_c0_g6	0	3	5	10	0	11
TRINITY_DN45658_c0_g3	109	84	58	22	64	73
TRINITY_DN45658_c0_g2	1422	1915	1463	593	464	1548
TRINITY_DN51846_c3_g4	1041	1006	512	402	210	746
TRINITY_DN51846_c3_g2	9950	8582	7966	7317	5523	8591
TRINITY_DN51846_c3_g1	1025	912	733	453	339	1041
TRINITY_DN17698_c0_g2	20	16	22	14	14	4
TRINITY_DN50848_c2_g1	12	8	8	14	0	2
TRINITY_DN41241_c4_g3	2478	2143	2003	2251	298	2309
TRINITY_DN41241_c4_g2	6	22	22	59	24	46
TRINITY_DN41241_c4_g1	38	40	28	60	94	39
TRINITY_DN33972_c0_g2	121	319	375	98	68	462
TRINITY_DN40131_c3_g3	48	56	49	60	31	105
TRINITY_DN34061_c2_g1	0	52	88	0	0	74
TRINITY_DN32263_c0_g1	0	2	0	2	6	4
TRINITY_DN49174_c5_g1	587	466	375	374	132	401
TRINITY_DN34527_c1_g1	11393	7849	10673	11051	2824	10297
TRINITY_DN43739_c4_g1	44	32	24	6	12	16
TRINITY_DN38043_c1_g2	90	158	66	158	114	172
TRINITY_DN48279_c1_g1	53	22	36	16	22	28
TRINITY_DN45436_c0_g2	594	90	28	972	12	78
TRINITY_DN48505_c2_g4	356	245	165	104	145	195
TRINITY_DN53884_c1_g2	5359	2977	2044	1034	2083	2248
TRINITY_DN48505_c2_g6	174	70	28	740	46	22
TRINITY_DN48505_c2_g1	22	10	14	34	55	10
TRINITY_DN111229_c0_g1	2	2	0	0	0	2
TRINITY_DN7434_c0_g1	0	10	4	0	0	0
TRINITY_DN52313_c0_g2	1011	1216	793	750	1076	1136
TRINITY_DN52313_c0_g1	955	1871	1197	1815	747	1913
TRINITY_DN46567_c4_g1	30	8	0	78	28	6
TRINITY_DN51781_c1_g2	4805	10350	8550	3375	1863	5532
TRINITY_DN51348_c0_g1	44	22	40	12	12	36
TRINITY_DN37129_c2_g1	30	42	24	4	20	56
TRINITY_DN41615_c5_g1	59	55	37	55	64	98
TRINITY_DN55068_c14_g1	7795	19266	14338	4280	4830	18703
TRINITY_DN55068_c14_g3	550	2078	1214	331	282	2051
TRINITY_DN32784_c0_g1	280	178	121	106	120	215
TRINITY_DN1033_c0_g1	0	0	0	0	0	0
TRINITY_DN36283_c0_g7	78	19	15	59	29	11
TRINITY_DN36283_c0_g6	8	10	5	4	8	12
TRINITY_DN51151_c0_g4	307	322	196	52	91	183
TRINITY_DN36283_c0_g4	15	10	6	13	7	10
TRINITY_DN36283_c0_g3	22	22	11	0	16	32
TRINITY_DN36283_c0_g2	806	781	693	1028	493	1016
TRINITY_DN36283_c0_g1	318	163	304	212	98	138
TRINITY_DN34174_c3_g6	709	358	346	374	316	218
TRINITY_DN43789_c2_g4	10778	6356	10963	6510	4981	8801
TRINITY_DN35122_c4_g2	3384	3696	4270	3399	1059	5012
TRINITY_DN38885_c3_g1	1101	1125	1108	1125	700	1198
TRINITY_DN38885_c3_g2	6	10	9	2	4	9
TRINITY_DN45197_c0_g2	78	270	128	229	262	213
TRINITY_DN38404_c1_g3	18	2	6	8	28	8
TRINITY_DN38404_c1_g2	2077	1414	1944	1422	968	1689
TRINITY_DN41348_c0_g3	210	86	68	64	190	58
TRINITY_DN53036_c3_g1	30	46	40	16	22	56
TRINITY_DN43622_c1_g1	545	1536	1546	599	291	1115
TRINITY_DN44870_c0_g9	46	0	2	6	28	10
TRINITY_DN36562_c3_g3	4842	4689	5787	4992	1247	5573
TRINITY_DN39014_c0_g1	7381	5094	6004	5243	3129	6573
TRINITY_DN43226_c1_g3	2925	3220	3117	2969	1309	3754
TRINITY_DN47317_c1_g8	40	0	0	22	8	0
TRINITY_DN53146_c3_g3	267	650	308	144	160	507
TRINITY_DN47317_c1_g3	0	2	2	0	0	10
TRINITY_DN52830_c1_g4	1	7	6	6	16	2
TRINITY_DN47317_c1_g1	726	173	59	479	391	92
TRINITY_DN47317_c1_g4	18	18	18	2	8	2
TRINITY_DN43189_c0_g5	14867	17958	18117	14535	7628	13825
TRINITY_DN39845_c2_g1	8	0	0	0	0	4
TRINITY_DN46588_c3_g1	56	78	40	39	43	96
TRINITY_DN43492_c0_g1	1066	975	641	1156	406	796
TRINITY_DN46588_c3_g2	142	237	140	108	86	212
TRINITY_DN47494_c1_g1	59	46	16	75	135	74
TRINITY_DN51380_c1_g2	4192	2703	2622	2607	1924	3004
TRINITY_DN46671_c2_g1	0	0	0	2	0	0
TRINITY_DN52176_c1_g4	91	52	34	24	46	40
TRINITY_DN41063_c5_g1	4	0	6	2	0	12
TRINITY_DN39133_c1_g3	343	541	460	1280	138	576
TRINITY_DN52176_c1_g3	7138	4543	5796	3956	2997	5513
TRINITY_DN48745_c2_g1	3194	4132	3905	3109	1544	4779
TRINITY_DN50960_c1_g1	968	930	731	707	690	1199
TRINITY_DN33250_c3_g8	12	28	29	6	6	25
TRINITY_DN33250_c3_g5	52	72	70	30	14	52
TRINITY_DN33250_c3_g4	10	96	52	78	6	48
TRINITY_DN33250_c3_g7	34	8	14	0	4	0
TRINITY_DN37767_c2_g2	843	680	804	614	398	650
TRINITY_DN33250_c3_g1	64	20	30	24	18	30
TRINITY_DN39265_c2_g1	1321	1245	1216	1012	733	1558
TRINITY_DN49626_c1_g1	617	865	867	1017	229	953
TRINITY_DN54444_c2_g1	3933	4149	4170	3101	1796	4196
TRINITY_DN38871_c1_g1	70	96	26	45	0	50
TRINITY_DN38871_c1_g5	729	662	449	248	226	568
TRINITY_DN76112_c0_g1	0	2	0	0	0	4
TRINITY_DN39140_c0_g1	34	47	57	0	120	71
TRINITY_DN39174_c0_g1	0	0	0	0	0	0
TRINITY_DN45200_c1_g1	953	424	193	180	317	227
TRINITY_DN45200_c1_g2	16	42	6	14	6	24
TRINITY_DN48186_c2_g5	82	135	112	38	34	120
TRINITY_DN41537_c1_g1	1201	900	766	1049	426	1030
TRINITY_DN41537_c1_g2	1649	1890	2393	1216	282	2170
TRINITY_DN42774_c2_g1	284	123	136	116	177	127
TRINITY_DN42774_c2_g2	964	980	980	898	218	975
TRINITY_DN41104_c2_g1	3263	2344	1769	1567	1776	2423
TRINITY_DN49480_c6_g2	32	8	22	38	12	43
TRINITY_DN36712_c1_g2	12	26	16	6	20	44
TRINITY_DN49480_c6_g1	108	29	45	36	44	22
TRINITY_DN37112_c0_g1	485	308	318	451	208	364
TRINITY_DN25456_c0_g2	0	0	0	0	0	0
TRINITY_DN42610_c2_g2	218	511	254	713	324	549
TRINITY_DN49212_c4_g3	10	16	0	6	4	0
TRINITY_DN38210_c2_g1	126438	113638	76775	61177	58578	90229
TRINITY_DN50853_c1_g1	275	326	236	244	101	319
TRINITY_DN50853_c1_g3	626	319	321	244	233	441
TRINITY_DN50853_c1_g2	418	37	28	55	328	23
TRINITY_DN50853_c1_g5	12	4	0	6	4	0
TRINITY_DN52857_c1_g1	120	272	76	211	235	240
TRINITY_DN50128_c0_g6	980	859	720	829	591	712
TRINITY_DN50039_c7_g1	1868	1600	1944	1395	846	1950
TRINITY_DN36788_c1_g13	52	94	26	68	42	158
TRINITY_DN25763_c0_g1	12	2	2	0	0	10
TRINITY_DN46633_c1_g1	3242	3450	2529	1963	2343	4130
TRINITY_DN51334_c2_g4	6	28	11	10	18	10
TRINITY_DN51334_c2_g3	481	560	480	464	383	480
TRINITY_DN53045_c0_g3	3	0	4	0	4	0
TRINITY_DN53045_c0_g1	1218	1166	725	925	335	764
TRINITY_DN42013_c1_g2	330	124	90	116	121	149
TRINITY_DN42013_c1_g1	1091	827	970	631	399	937
TRINITY_DN41213_c3_g3	2276	2226	2085	1888	1264	2148
TRINITY_DN41213_c3_g1	340	775	565	314	142	454
TRINITY_DN44987_c2_g2	7101	4339	6395	6260	1921	4782
TRINITY_DN39784_c3_g1	1331	988	657	824	888	436
TRINITY_DN52838_c2_g4	35410	33569	32946	30082	20317	36958
TRINITY_DN52838_c2_g3	236	146	120	44	78	243
TRINITY_DN44519_c0_g1	907	449	673	639	273	734
TRINITY_DN45690_c5_g1	1854	1654	1691	1456	787	1537
TRINITY_DN43653_c0_g3	176	0	0	70	70	0
TRINITY_DN42490_c0_g4	0	0	0	0	0	0
TRINITY_DN42490_c0_g5	1675	2134	2018	1490	982	1475
TRINITY_DN42490_c0_g2	46	14	18	54	22	22
TRINITY_DN44273_c1_g1	2	0	0	2	0	2
TRINITY_DN41014_c0_g3	10	44	2	6	8	14
TRINITY_DN38777_c1_g3	70	155	92	164	136	86
TRINITY_DN43248_c1_g1	13	183	69	80	63	176
TRINITY_DN35089_c3_g1	4	2	10	6	10	2
TRINITY_DN38002_c3_g1	1731	973	1076	1931	763	1455
TRINITY_DN46643_c1_g3	14131	11474	13767	11711	5283	9290
TRINITY_DN46643_c1_g2	85	200	130	200	221	158
TRINITY_DN34804_c1_g4	124	70	72	76	82	84
TRINITY_DN37083_c0_g2	1194	1171	581	437	424	1071
TRINITY_DN37083_c0_g1	1468	1408	1496	1022	858	1521
TRINITY_DN45482_c0_g2	3366	3876	3741	3398	1486	4735
[truncated: 36,953 more rows]
