# Supplementary material for: Altered Immune Landscape and Disrupted Coral-Symbiodinium Symbiosis in the Scleractinian Coral Pocillopora damicornis by Vibrio coralliilyticus Challenge
Source: Front Physiol. 2019 Apr 2;10:366. doi: 10.3389/fphys.2019.00366 (PMC6454040; doi:10.3389/fphys.2019.00366)
Supplement: Supplementary file 5 [file Table_5.XLSX]

## Sheet: down_reg_go_over
Table S5. Overrepresented GO terms of significantly downregulated zooxanthella genes
	GO-ID	Description	p-val	corr p-val	cluster freq	total freq	genes
1	GO:0046395	carboxylic acid catabolic process	7.5534e-07	0.00044121	10/87 11.4%	281/18608 1.5%	TRINITY_DN44849_C1_G2 TRINITY_DN46713_C1_G2 TRINITY_DN46713_C1_G3 TRINITY_DN50167_C4_G1 TRINITY_DN42914_C2_G1 TRINITY_DN48316_C2_G1 TRINITY_DN50127_C3_G1 TRINITY_DN49241_C2_G2 TRINITY_DN47858_C1_G7 TRINITY_DN45516_C1_G3
2	GO:0016054	organic acid catabolic process	7.5534e-07	0.00044121	10/87 11.4%	281/18608 1.5%	TRINITY_DN44849_C1_G2 TRINITY_DN46713_C1_G2 TRINITY_DN46713_C1_G3 TRINITY_DN50167_C4_G1 TRINITY_DN42914_C2_G1 TRINITY_DN48316_C2_G1 TRINITY_DN50127_C3_G1 TRINITY_DN49241_C2_G2 TRINITY_DN47858_C1_G7 TRINITY_DN45516_C1_G3
3	GO:0044282	small molecule catabolic process	8.7023e-07	0.00044121	15/87 17.2%	706/18608 3.7%	TRINITY_DN44849_C1_G2 TRINITY_DN50167_C4_G1 TRINITY_DN48316_C2_G1 TRINITY_DN49241_C2_G2 TRINITY_DN47858_C1_G7 TRINITY_DN45832_C3_G5 TRINITY_DN49374_C1_G2 TRINITY_DN46713_C1_G2 TRINITY_DN46713_C1_G3 TRINITY_DN42914_C2_G1 TRINITY_DN49474_C3_G1 TRINITY_DN52816_C0_G2 TRINITY_DN50127_C3_G1 TRINITY_DN45516_C1_G3 TRINITY_DN52392_C1_G1
4	GO:0009310	amine catabolic process	3.4923e-06	0.001328	8/87 9.1%	194/18608 1.0%	TRINITY_DN46713_C1_G2 TRINITY_DN46713_C1_G3 TRINITY_DN42914_C2_G1 TRINITY_DN48316_C2_G1 TRINITY_DN49474_C3_G1 TRINITY_DN50127_C3_G1 TRINITY_DN47858_C1_G7 TRINITY_DN45516_C1_G3
5	GO:0009063	cellular amino acid catabolic process	5.7344e-06	0.0017444	7/87 8.0%	147/18608 0.7%	TRINITY_DN46713_C1_G2 TRINITY_DN46713_C1_G3 TRINITY_DN42914_C2_G1 TRINITY_DN48316_C2_G1 TRINITY_DN50127_C3_G1 TRINITY_DN47858_C1_G7 TRINITY_DN45516_C1_G3
6	GO:0001817	regulation of cytokine production	1.483e-05	0.0037595	9/87 10.3%	311/18608 1.6%	TRINITY_DN52048_C1_G1 TRINITY_DN54175_C3_G1 TRINITY_DN47987_C1_G3 TRINITY_DN48098_C4_G3 TRINITY_DN99356_C0_G1 TRINITY_DN34454_C3_G3 TRINITY_DN32589_C0_G1 TRINITY_DN44137_C0_G1 TRINITY_DN50958_C2_G3
7	GO:0009056	catabolic process	1.7849e-05	0.0038784	28/87 32.1%	2663/18608 14.3%	TRINITY_DN44849_C1_G2 TRINITY_DN47672_C1_G1 TRINITY_DN42002_C1_G1 TRINITY_DN49402_C1_G1 TRINITY_DN50167_C4_G1 TRINITY_DN48316_C2_G1 TRINITY_DN49241_C2_G2 TRINITY_DN41302_C0_G1 TRINITY_DN48496_C1_G1 TRINITY_DN49374_C1_G2 TRINITY_DN49346_C2_G5 TRINITY_DN46713_C1_G2 TRINITY_DN46713_C1_G3 TRINITY_DN49474_C3_G1 TRINITY_DN47172_C0_G1 TRINITY_DN45516_C1_G3 TRINITY_DN46363_C2_G1 TRINITY_DN52392_C1_G1 TRI…
